# Supplementary material for: Regio- and Stereoselectivity of the Norrish–Yang Photocyclization of Dialkyl 1,2-Diketones: Solution versus Solid State Photochemistry of Two Polymorphs
Source: PubMed Central journal article supplement (PMC9639068; doi:10.1021/acs.joc.2c01855), 2022-10-25

## Supporting Information

**Regio- and Stereoselectivity of the Norrish-Yang photocyclization of dialkyl 1,2-diketones.**

**Solution versus solid state photochemistry of two polymorphs**

Dimitri Alvarez-Dorta,<sup>a</sup> Elisa I. León,<sup>a\*</sup> Ángeles Martín,<sup>a</sup> Alan R. Kennedy,<sup>b</sup> Inés Pérez-Martín,<sup>a</sup>  
Kenneth Shankland,<sup>c</sup> and Ernesto Suárez<sup>a\*</sup>

<sup>a</sup> Síntesis de Productos Naturales, Instituto de Productos Naturales y Agrobiología del CSIC, Avda.  
Astrofísico Francisco Sánchez 3, 38206, La Laguna, Tenerife, Spain

<sup>b</sup> WestCHEM Department of Pure and Applied Chemistry, University of Strathclyde, Glasgow G1  
1XL, Scotland, United Kingdom

<sup>c</sup> School of Pharmacy, University of Reading, Reading, RG6 6AD, United Kingdom

---

## Table of Contents

|                                                                                                               |         |
|---------------------------------------------------------------------------------------------------------------|---------|
| 1. Figure S1. Most Significant NOESY Correlations for Compounds <b>2–4</b> .....                              | S3      |
| 2. Figure S2. Most Significant HMBC Correlations for Compounds <b>2–4</b> .....                               | S3      |
| 3. Figure S3. Definition of Geometrical Parameters $D$ , $d$ , $\omega$ , $\Delta$ , and $\theta$ .....       | S3      |
| 4. Figure S4. Photoreactor description.....                                                                   | S3      |
| 5. Table S1. Geometrical Parameters of 1,2-Diketone <b>1</b> , Conformer <b>A</b> .....                       | S4      |
| 6. Table S2. Geometrical Parameters of 1,2-Diketone <b>1</b> , Conformer <b>B</b> .....                       | S4      |
| 7. Table S3. Coordinated Scan Calculation of C18–C13–C17–O Dihedral in 1,2-Diketone <b>1</b> ..               | S5–S6   |
| 8. Figure S5. Coordinated Scan of C18–C13–C17–O Dihedral in 1,2-Diketone <b>1</b> .....                       | S7      |
| 9. Figure S6. Ortep Diagram of Polymorph <b>1A</b> .....                                                      | S8      |
| 10. Table S4. Geometrical Parameters Polymorph <b>1A</b> , Solid State.....                                   | S8      |
| 11. Figure S7. Ortep Diagram of Polymorph <b>1B</b> .....                                                     | S8      |
| 12. Table S5. Geometrical Parameters Polymorph <b>1B</b> , Solid State.....                                   | S8      |
| 13. Table S6. Crystal Data and Structure Refinements for Polymorphs <b>1A</b> and <b>1B</b> .....             | S9      |
| 14. Figure S8. Ortep Diagram of Compound <b>3</b> .....                                                       | S10     |
| 15. Table S7. Crystal Data and Structure Refinements for Compound <b>3</b> .....                              | S10     |
| 16. Figure S9. PXRD pattern before irradiation of polymorph <b>1A</b> .....                                   | S11     |
| 17. Figure S10. PXRD pattern after irradiation of polymorph <b>1A</b> .....                                   | S11     |
| 18. Figure S11. PXRD pattern before irradiation of polymorph <b>1B</b> .....                                  | S12     |
| 19. Figure S12. PXRD pattern after irradiation of polymorph <b>1B</b> .....                                   | S12     |
| 20. Figure S13. PXDR pattern of polymorph <b>1A</b> after irradiation and simulated pattern of <b>3</b> ..... | S13     |
| 21. Figure S14. PXDR patterns of polymorphs <b>1A</b> and <b>1B</b> , before irradiation.....                 | S14     |
| 22. $^1\text{H}$ and $^{13}\text{C}\{^1\text{H}\}$ NMR spectra of compound <b>1</b> .....                     | S15–S16 |
| 23. 1D and 2D NMR spectra of compound <b>2</b> .....                                                          | S17–S24 |
| 24. 1D and 2D NMR spectra of compound <b>3</b> .....                                                          | S25–S32 |
| 25. 1D and 2D NMR spectra of compound <b>4</b> .....                                                          | S33–S40 |

---

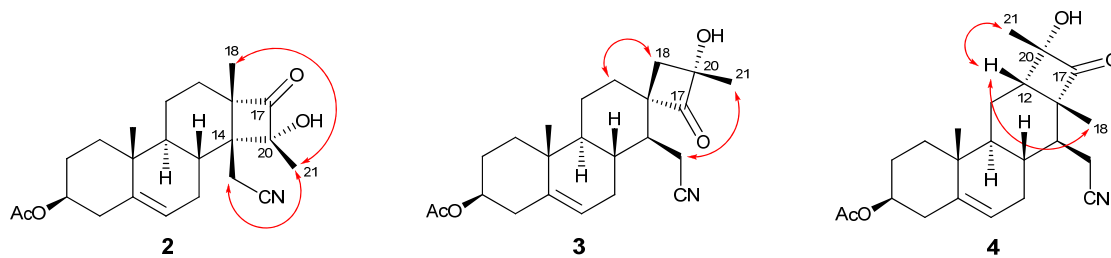

**Figure S1.** Most Significant NOESY Correlations for Compounds 2–4. All 2D spectra at 500 MHz, in  $\text{CDCl}_3$ .

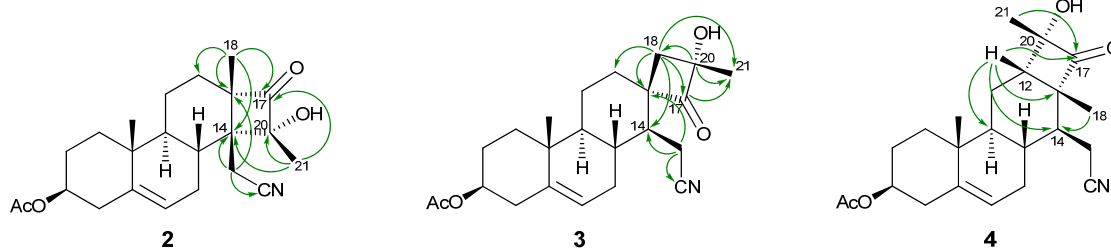

**Figure S2.** Most Significant HMBC Correlations for Compounds 2–4. All 2D spectra at 500 MHz, in  $\text{CDCl}_3$ , ( $\text{H} \rightarrow \text{C}$ )

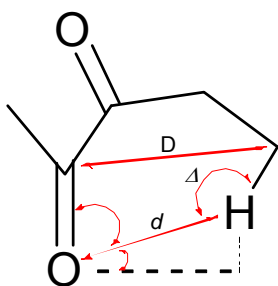

**Figure S3.** Definition of Geometrical Parameters  $D$ ,  $d$ ,  $\omega$ ,  $\Delta$ , and  $\theta$  for Intramolecular HAT.<sup>1</sup> The distance between the  $\gamma$ -hydrogen atom and the carbonyl oxygen atom ( $d$ ), with the ideal value less than 2.4–2.7 Å; the distance between the reacting carbon atoms ( $D$ ), with the ideal value less than  $3.0 \pm 0.09$  Å; the  $\text{C}=\text{O}\cdots\text{H}$  angle between the carbonyl group and the  $\gamma$ -hydrogen atom ( $\Delta$ ), with the ideal values in the range 90–120; the  $\text{C}-\text{H}\cdots\text{O}$  angle formed by the  $\gamma$ -carbon,  $\gamma$ -hydrogen, and carbonyl oxygen ( $\theta$ ), with the ideal value 180°; the torsion angle describing the deviation of the  $\gamma$ -hydrogen from the plane of the carbonyl group ( $\omega$ ), with the ideal value 0°.

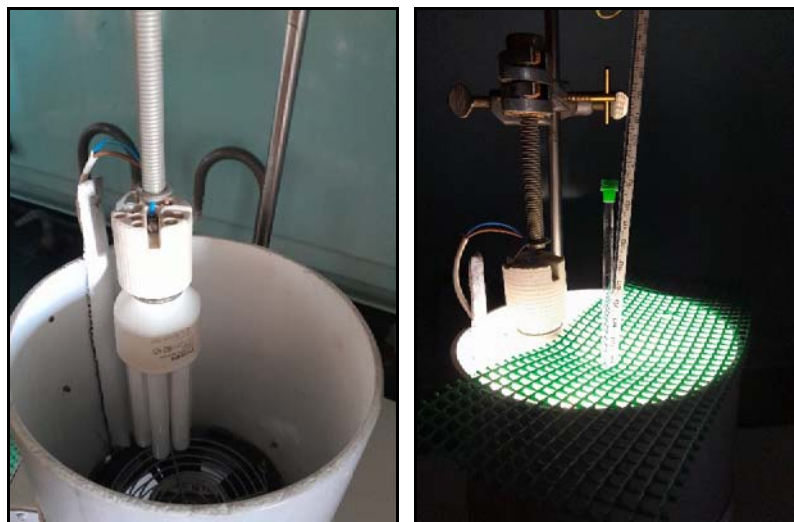

**Figure S4.** For the irradiation we used a homemade photoreactor, based in a white walls cylindrical plastic container, with a daylight lamp on the top and a fan on the bottom.

(1) (a) H. Ihmels, J. R. Scheffer, *Tetrahedron* **1999**, 55, 885–907; (b) A. Natarajan, J. T. Mague, V. Ramamurthy, *J. Am. Chem. Soc.* **2005**, 127, 3568–3576; (c) W. Xia, J. R. Scheffer, M. Botoshansky, M. Kaftory, *Org. Lett.* **2005**, 7, 1315–1318.

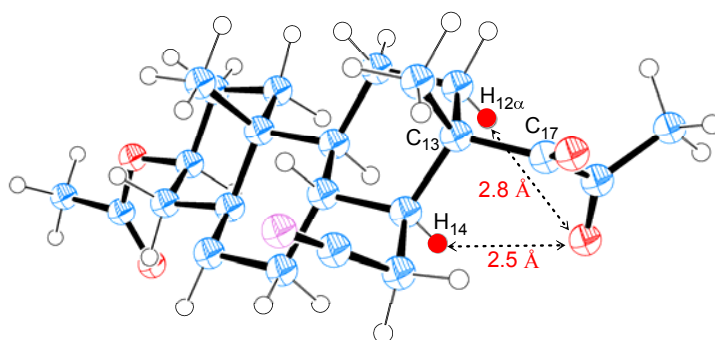

**Table S1.** Geometrical Parameters 1,2-Diketone **1**, Conformer **A**.<sup>[a]</sup>

| Abstraction    | $d$ [Å] | $D$ [Å]        | $\omega$ [°] | $\Delta$ [°] | $\theta$ [°] |
|----------------|---------|----------------|--------------|--------------|--------------|
| $H_{12\alpha}$ | 2.8     | 2.9            | 77.3         | 67.3         | 114.6        |
| $H_{12\beta}$  | 3.9     | 2.9            | 73.2         | 43.7         | 54.5         |
| $H_{14}$       | 2.5     | 3.2            | 27.6         | 96.8         | 121.1        |
| $H_{18}$       | 4.8     | 3.8            | 28.3         | 35.2         | 64.0         |
| Optimum value  | 2.4–2.7 | $3.0 \pm 0.09$ | 0            | 90–120       | 180          |

[a] Dihedral  $C_{18}-C_{13}-C_{17}-O = 20^\circ$ . Relative energy = 0 kcal mol<sup>-1</sup>. Potentially abstractable hydrogens are shown in red.

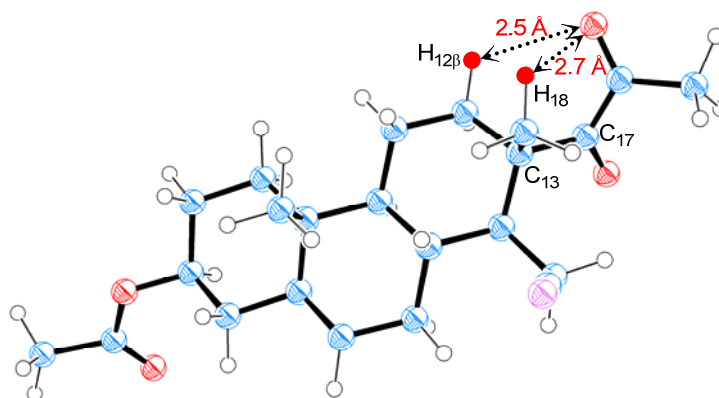

**Table S2.** Geometrical Parameters 1,2-Diketone **1**, Conformer **B**.<sup>[a]</sup>

| Abstraction    | $d$ [Å] | $D$ [Å]        | $\omega$ [°] | $\Delta$ [°] | $\theta$ [°] |
|----------------|---------|----------------|--------------|--------------|--------------|
| $H_{12\alpha}$ | 3.5     | 3.2            | -4.2         | 80.5         | 64.2         |
| $H_{12\beta}$  | 2.5     | 3.2            | 18.2         | 99.5         | 114.6        |
| $H_{14}$       | 4.7     | 3.8            | 3.2          | 49.8         | 71.3         |
| $H_{18}$       | 2.7     | 2.9            | 68.7         | 78.7         | 110.2        |
| Optimum value  | 2.4–2.7 | $3.0 \pm 0.09$ | 0            | 90–120       | 180          |

[a] Dihedral  $C_{18}-C_{13}-C_{17}-O = 141^\circ$ . Relative energy = 0.5 kcal mol<sup>-1</sup>. Potentially abstractable hydrogens are shown in red.

**Table S3.** Coordinated scan calculation of C18–C13–C17–O dihedral in compound **1**<sup>[a]</sup>

| Dihedral<br>C18–C13–<br>C17–O<br>(°) | Relative<br>Energy<br>AMBER*<br>(kcal mol <sup>-1</sup> ) | Dihedral<br>C18–C13–<br>C17–O<br>(°) | Relative<br>Energy<br>AMBER*<br>(kcal mol <sup>-1</sup> ) | Dihedral<br>C18–C13–<br>C17–O<br>(°) | Relative<br>Energy<br>AMBER*<br>(kcal mol <sup>-1</sup> ) | Dihedral<br>C18–C13–<br>C17–O<br>(°) | Relative<br>Energy<br>AMBER*<br>(kcal mol <sup>-1</sup> ) |
|--------------------------------------|-----------------------------------------------------------|--------------------------------------|-----------------------------------------------------------|--------------------------------------|-----------------------------------------------------------|--------------------------------------|-----------------------------------------------------------|
| -180                                 | 2.7294                                                    | -132                                 | 5.4171                                                    | -84                                  | 5.2298                                                    | -36                                  | 1.2595                                                    |
| -179                                 | 2.8156                                                    | -131                                 | 5.4066                                                    | -83                                  | 5.2123                                                    | -35                                  | 1.1865                                                    |
| -178                                 | 2.9048                                                    | -130                                 | 5.3929                                                    | -82                                  | 5.1879                                                    | -34                                  | 1.1151                                                    |
| -177                                 | 2.9959                                                    | -129                                 | 5.3760                                                    | -81                                  | 5.1576                                                    | -33                                  | 1.0459                                                    |
| -176                                 | 3.0893                                                    | -128                                 | 5.3582                                                    | -80                                  | 5.1220                                                    | -32                                  | 0.9802                                                    |
| -175                                 | 3.1834                                                    | -127                                 | 5.3432                                                    | -79                                  | 5.0778                                                    | -31                                  | 0.9171                                                    |
| -174                                 | 3.2790                                                    | -126                                 | 5.3276                                                    | -78                                  | 5.0252                                                    | -30                                  | 0.8543                                                    |
| -173                                 | 3.3779                                                    | -125                                 | 5.3118                                                    | -77                                  | 4.9675                                                    | -29                                  | 0.7958                                                    |
| -172                                 | 3.4777                                                    | -124                                 | 5.2927                                                    | -76                                  | 4.9023                                                    | -28                                  | 0.7394                                                    |
| -171                                 | 3.5792                                                    | -123                                 | 5.2759                                                    | -75                                  | 4.8318                                                    | -27                                  | 0.6848                                                    |
| -170                                 | 3.6830                                                    | -122                                 | 5.2592                                                    | -74                                  | 4.7555                                                    | -26                                  | 0.6333                                                    |
| -169                                 | 3.7893                                                    | -121                                 | 5.2429                                                    | -73                                  | 4.6712                                                    | -25                                  | 0.5853                                                    |
| -168                                 | 3.8957                                                    | -120                                 | 5.2289                                                    | -72                                  | 4.5858                                                    | -24                                  | 0.5395                                                    |
| -167                                 | 4.0040                                                    | -119                                 | 5.2164                                                    | -71                                  | 4.4965                                                    | -23                                  | 0.4954                                                    |
| -166                                 | 4.1138                                                    | -118                                 | 5.2037                                                    | -70                                  | 4.4027                                                    | -22                                  | 0.4536                                                    |
| -165                                 | 4.2231                                                    | -117                                 | 5.1902                                                    | -69                                  | 4.3086                                                    | -21                                  | 0.4144                                                    |
| -164                                 | 4.3324                                                    | -116                                 | 5.1786                                                    | -68                                  | 4.2094                                                    | -20                                  | 0.3777                                                    |
| -163                                 | 4.4449                                                    | -115                                 | 5.1678                                                    | -67                                  | 4.1060                                                    | -19                                  | 0.3440                                                    |
| -162                                 | 4.5572                                                    | -114                                 | 5.1597                                                    | -66                                  | 4.0053                                                    | -18                                  | 0.3107                                                    |
| -161                                 | 4.6687                                                    | -113                                 | 5.1521                                                    | -65                                  | 3.9000                                                    | -17                                  | 0.2819                                                    |
| -160                                 | 4.7793                                                    | -112                                 | 5.1469                                                    | -64                                  | 3.7962                                                    | -16                                  | 0.2556                                                    |
| -159                                 | 4.8846                                                    | -111                                 | 5.1429                                                    | -63                                  | 3.6910                                                    | -15                                  | 0.2302                                                    |
| -158                                 | 4.9857                                                    | -110                                 | 5.1391                                                    | -62                                  | 3.5871                                                    | -14                                  | 0.2066                                                    |
| -157                                 | 4.8816                                                    | -109                                 | 5.1372                                                    | -61                                  | 3.4833                                                    | -13                                  | 0.1855                                                    |
| -156                                 | 4.9325                                                    | -108                                 | 5.1358                                                    | -60                                  | 3.3804                                                    | -12                                  | 0.1676                                                    |
| -155                                 | 4.9820                                                    | -107                                 | 5.1371                                                    | -59                                  | 3.2770                                                    | -11                                  | 0.1506                                                    |
| -154                                 | 5.0275                                                    | -106                                 | 5.1396                                                    | -58                                  | 3.1749                                                    | -10                                  | 0.1352                                                    |
| -153                                 | 5.0702                                                    | -105                                 | 5.1420                                                    | -57                                  | 3.0747                                                    | -9                                   | 0.1226                                                    |
| -152                                 | 5.1087                                                    | -104                                 | 5.1468                                                    | -56                                  | 2.9780                                                    | -8                                   | 0.1112                                                    |
| -151                                 | 5.1493                                                    | -103                                 | 5.1511                                                    | -55                                  | 2.8807                                                    | -7                                   | 0.1019                                                    |
| -150                                 | 5.1865                                                    | -102                                 | 5.1586                                                    | -54                                  | 2.7860                                                    | -6                                   | 0.0934                                                    |
| -149                                 | 5.2192                                                    | -101                                 | 5.1635                                                    | -53                                  | 2.6936                                                    | -5                                   | 0.0863                                                    |
| -148                                 | 5.2513                                                    | -100                                 | 5.1699                                                    | -52                                  | 2.6011                                                    | -4                                   | 0.0815                                                    |
| -147                                 | 5.2791                                                    | -99                                  | 5.1780                                                    | -51                                  | 2.5112                                                    | -3                                   | 0.0767                                                    |
| -146                                 | 5.3060                                                    | -98                                  | 5.1856                                                    | -50                                  | 2.4222                                                    | -2                                   | 0.0734                                                    |
| -145                                 | 5.3313                                                    | -97                                  | 5.1950                                                    | -49                                  | 2.3357                                                    | -1                                   | 0.0702                                                    |
| -144                                 | 5.3521                                                    | -96                                  | 5.2017                                                    | -48                                  | 2.2506                                                    | 0                                    | 0.0679                                                    |
| -143                                 | 5.3704                                                    | -95                                  | 5.2116                                                    | -47                                  | 2.1661                                                    | 1                                    | 0.0672                                                    |
| -142                                 | 5.3898                                                    | -94                                  | 5.2229                                                    | -46                                  | 2.0814                                                    | 2                                    | 0.0656                                                    |
| -141                                 | 5.4045                                                    | -93                                  | 5.2304                                                    | -45                                  | 1.9976                                                    | 3                                    | 0.0643                                                    |
| -140                                 | 5.4136                                                    | -92                                  | 5.2377                                                    | -44                                  | 1.9112                                                    | 4                                    | 0.0620                                                    |
| -139                                 | 5.4223                                                    | -91                                  | 5.2430                                                    | -43                                  | 1.8252                                                    | 5                                    | 0.0607                                                    |
| -138                                 | 5.4312                                                    | -90                                  | 5.2504                                                    | -42                                  | 1.7415                                                    | 6                                    | 0.0579                                                    |
| -137                                 | 5.4361                                                    | -89                                  | 5.2551                                                    | -41                                  | 1.6583                                                    | 7                                    | 0.0551                                                    |
| -136                                 | 5.4378                                                    | -88                                  | 5.2540                                                    | -40                                  | 1.5749                                                    | 8                                    | 0.0525                                                    |
| -135                                 | 5.4361                                                    | -87                                  | 5.2539                                                    | -39                                  | 1.4933                                                    | 9                                    | 0.0496                                                    |
| -134                                 | 5.4342                                                    | -86                                  | 5.2500                                                    | -38                                  | 1.4140                                                    | 10                                   | 0.0475                                                    |
| -133                                 | 5.4268                                                    | -85                                  | 5.2414                                                    | -37                                  | 1.3356                                                    | 11                                   | 0.0429                                                    |

| Dihedral C18–C13–C17–O (°) | Relative Energy AMBER* (kcal mol <sup>-1</sup> ) | Dihedral C18–C13–C17–O (°) | Relative Energy AMBER* (kcal mol <sup>-1</sup> ) | Dihedral C18–C13–C17–O (°) | Relative Energy AMBER* (kcal mol <sup>-1</sup> ) | Dihedral C18–C13–C17–O (°) | Relative Energy AMBER* (kcal mol <sup>-1</sup> ) |
|----------------------------|--------------------------------------------------|----------------------------|--------------------------------------------------|----------------------------|--------------------------------------------------|----------------------------|--------------------------------------------------|
| 12                         | 0.0376                                           | 55                         | 1.8765                                           | 98                         | 2.2830                                           | <b>141</b>                 | <b>0.5560</b>                                    |
| 13                         | 0.0324                                           | 56                         | 1.9612                                           | 99                         | 2.2248                                           | 142                        | 0.5586                                           |
| 14                         | 0.0267                                           | 57                         | 2.0451                                           | 100                        | 2.1658                                           | 143                        | 0.5644                                           |
| 15                         | 0.0202                                           | 58                         | 2.1247                                           | 101                        | 2.1055                                           | 144                        | 0.5759                                           |
| 16                         | 0.0138                                           | 59                         | 2.2079                                           | 102                        | 2.0472                                           | 145                        | 0.5895                                           |
| 17                         | 0.0085                                           | 60                         | 2.2851                                           | 103                        | 1.9862                                           | 146                        | 0.6073                                           |
| 18                         | 0.0042                                           | 61                         | 2.3637                                           | 104                        | 1.9287                                           | 147                        | 0.6295                                           |
| 19                         | 0.0014                                           | 62                         | 2.4376                                           | 105                        | 1.8715                                           | 148                        | 0.6550                                           |
| <b>20</b>                  | <b>0.0000</b>                                    | 63                         | 2.5069                                           | 106                        | 1.8137                                           | 149                        | 0.6851                                           |
| 21                         | 0.0016                                           | 64                         | 2.5731                                           | 107                        | 1.7571                                           | 150                        | 0.7183                                           |
| 22                         | 0.0037                                           | 65                         | 2.6386                                           | 108                        | 1.7012                                           | 151                        | 0.7558                                           |
| 23                         | 0.0097                                           | 66                         | 2.6975                                           | 109                        | 1.6465                                           | 152                        | 0.7962                                           |
| 24                         | 0.0170                                           | 67                         | 2.7558                                           | 110                        | 1.5945                                           | 153                        | 0.8395                                           |
| 25                         | 0.0307                                           | 68                         | 2.8069                                           | 111                        | 1.5421                                           | 154                        | 0.8875                                           |
| 26                         | 0.0475                                           | 69                         | 2.8535                                           | 112                        | 1.4938                                           | 155                        | 0.9371                                           |
| 27                         | 0.0686                                           | 70                         | 2.8919                                           | 113                        | 1.4406                                           | 156                        | 0.9901                                           |
| 28                         | 0.0928                                           | 71                         | 2.9282                                           | 114                        | 1.3947                                           | 157                        | 1.0467                                           |
| 29                         | 0.1193                                           | 72                         | 2.9593                                           | 115                        | 1.3463                                           | 158                        | 1.1047                                           |
| 30                         | 0.1486                                           | 73                         | 2.9833                                           | 116                        | 1.3013                                           | 159                        | 1.1636                                           |
| 31                         | 0.1838                                           | 74                         | 3.0013                                           | 117                        | 1.2570                                           | 160                        | 1.2256                                           |
| 32                         | 0.2215                                           | 75                         | 3.0167                                           | 118                        | 1.2146                                           | 161                        | 1.2905                                           |
| 33                         | 0.2653                                           | 76                         | 3.0291                                           | 119                        | 1.1763                                           | 162                        | 1.3550                                           |
| 34                         | 0.3100                                           | 77                         | 3.0362                                           | 120                        | 1.1341                                           | 163                        | 1.4215                                           |
| 35                         | 0.3620                                           | 78                         | 3.0400                                           | 121                        | 1.0945                                           | 164                        | 1.4909                                           |
| 36                         | 0.4168                                           | 79                         | 3.0377                                           | 122                        | 1.0554                                           | 165                        | 1.5613                                           |
| 37                         | 0.4738                                           | 80                         | 3.0312                                           | 123                        | 1.0176                                           | 166                        | 1.6330                                           |
| 38                         | 0.5337                                           | 81                         | 3.0202                                           | 124                        | 0.9800                                           | 167                        | 1.7026                                           |
| 39                         | 0.5960                                           | 82                         | 3.0060                                           | 125                        | 0.9457                                           | 168                        | 1.7773                                           |
| 40                         | 0.6629                                           | 83                         | 2.9841                                           | 126                        | 0.9110                                           | 169                        | 1.8488                                           |
| 41                         | 0.7312                                           | 84                         | 2.9590                                           | 127                        | 0.8780                                           | 170                        | 1.9219                                           |
| 42                         | 0.8025                                           | 85                         | 2.9307                                           | 128                        | 0.8446                                           | 171                        | 1.9983                                           |
| 43                         | 0.8781                                           | 86                         | 2.8976                                           | 129                        | 0.8099                                           | 172                        | 2.0742                                           |
| 44                         | 0.9532                                           | 87                         | 2.8601                                           | 130                        | 0.7771                                           | 173                        | 2.1504                                           |
| 45                         | 1.0335                                           | 88                         | 2.8185                                           | 131                        | 0.7460                                           | 174                        | 2.2283                                           |
| 46                         | 1.1155                                           | 89                         | 2.7735                                           | 132                        | 0.7146                                           | 175                        | 2.3076                                           |
| 47                         | 1.1975                                           | 90                         | 2.7287                                           | 133                        | 0.6858                                           | 176                        | 2.3875                                           |
| 48                         | 1.2783                                           | 91                         | 2.6762                                           | 134                        | 0.6581                                           | 177                        | 2.4696                                           |
| 49                         | 1.3624                                           | 92                         | 2.6252                                           | 135                        | 0.6315                                           | 178                        | 2.5519                                           |
| 50                         | 1.4475                                           | 93                         | 2.5710                                           | 136                        | 0.6087                                           | 179                        | 2.6361                                           |
| 51                         | 1.5333                                           | 94                         | 2.5156                                           | 137                        | 0.5906                                           | 180                        | 2.7222                                           |
| 52                         | 1.6183                                           | 95                         | 2.4597                                           | 138                        | 0.5755                                           |                            |                                                  |
| 53                         | 1.7045                                           | 96                         | 2.4000                                           | 139                        | 0.5645                                           |                            |                                                  |
| 54                         | 1.7912                                           | 97                         | 2.3429                                           | 140                        | 0.5580                                           |                            |                                                  |

[a] Molecular mechanics calculations performed with AMBER\* force field as implemented in MacroModel v 9.7 with the GB/SA solvent model for CHCl<sub>3</sub>, Schrödinger, LLC, New York. The minimum for each conformational isomer was calculated performing a coordinated scan calculation of C18–C13–C17–O dihedral in increments of 1°. The dicarbonyl system deviates appreciably from *trans* coplanarity. Intercarbonyl dihedral angle of 134.5° as measured in the X-ray structure was used for the study.

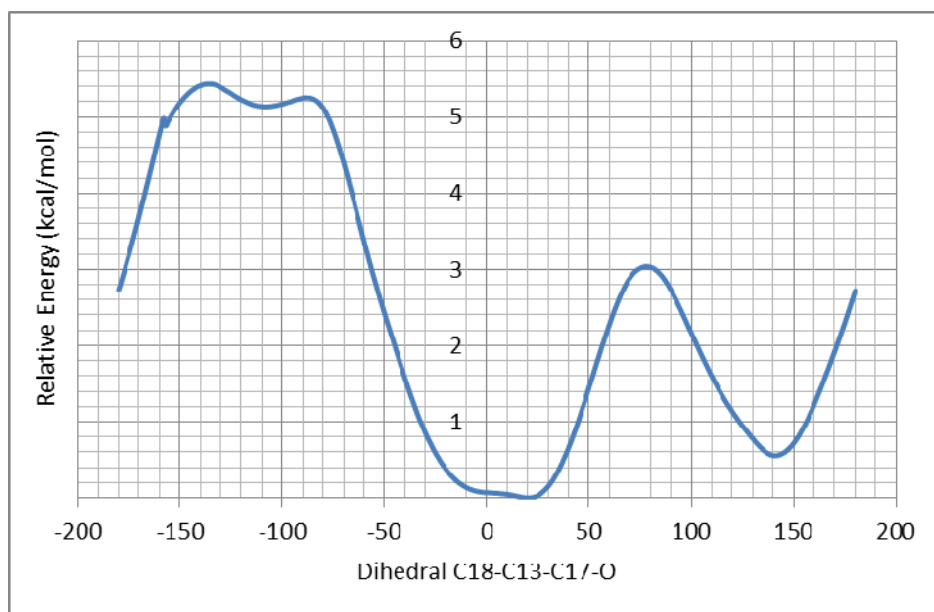

**Figure S5.** Coordinated scan of C18–C13–C17–O dihedral in compound **1**

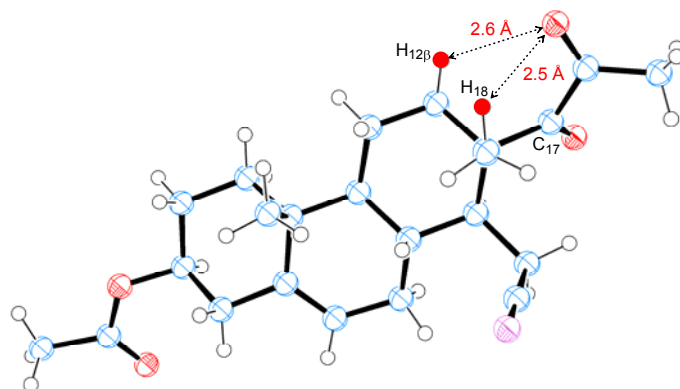

**Figure S6.** Ortep Diagram of Polymorph **1A** with 50% Probability Ellipsoid.

**Table S4.** Geometrical Parameters of Polymorph **1A**, Solid State, X-Ray Crystallography.<sup>[a]</sup>

| Abstraction                        | $d$ [Å] | D [Å]      | $\omega$ [°] | $\Delta$ [°] | $\theta$ [°] |
|------------------------------------|---------|------------|--------------|--------------|--------------|
| H <sub>12<math>\alpha</math></sub> | 3.7     | 3.3        | -12.5        | 77.6         | 57.6         |
| H <sub>12<math>\beta</math></sub>  | 2.6     | 3.3        | -1.6         | 97.4         | 120.5        |
| H <sub>14</sub>                    | 4.8     | 3.9        | 3.5          | 51.5         | 68.1         |
| H <sub>18</sub>                    | 2.5     | 2.9        | 54.1         | 88.1         | 115.9        |
| Optimum value                      | 2.4–2.7 | 3.0 ± 0.09 | 0            | 90–120       | 180          |

[a] Dihedral C<sub>18</sub>–C<sub>13</sub>–C<sub>17</sub>–O = 148.17(13)°. Potentially abstractable hydrogens are shown in red.

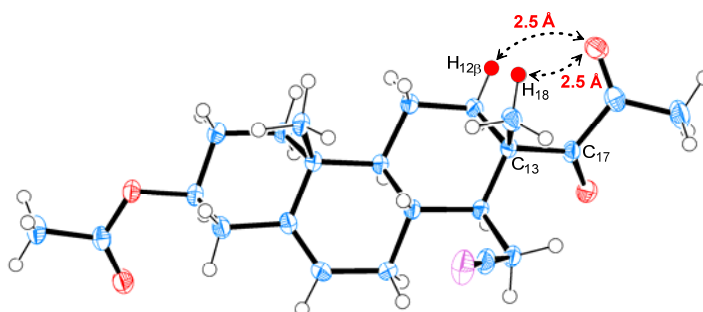

**Figure S7.** Ortep Diagram of Polymorph **1B** with 50% Probability Ellipsoid.

**Table S5.** Geometrical Parameters of Polymorph **1B**, Solid State, X-Ray Crystallography.<sup>[a]</sup>

| Abstraction                        | $d$ [Å] | D [Å]      | $\omega$ [°] | $\Delta$ [°] | $\theta$ [°] |
|------------------------------------|---------|------------|--------------|--------------|--------------|
| H <sub>12<math>\alpha</math></sub> | 3.5     | 3.3        | -18.6        | 79.8         | 58.5         |
| H <sub>12<math>\beta</math></sub>  | 2.5     | 3.3        | -7.7         | 99.7         | 122.2        |
| H <sub>14</sub>                    | 4.7     | 4.0        | -0.6         | 56.5         | 70.0         |
| H <sub>18</sub>                    | 2.5     | 3.0        | 49.7         | 91.1         | 114.1        |
| Optimum value                      | 2.4–2.7 | 3.0 ± 0.09 | 0            | 90–120       | 180          |

[a] Dihedral C<sub>18</sub>–C<sub>13</sub>–C<sub>17</sub>–O = 142.3(2)°. Potentially abstractable hydrogens are shown in red.



**Table S6.** Crystal Data and Structure Refinements for Polymorphs **1A** and **1B**.

| Polymorph                                           | <b>1A</b>                                                       | <b>1B</b>                                                       |
|-----------------------------------------------------|-----------------------------------------------------------------|-----------------------------------------------------------------|
| Empirical formula                                   | C <sub>23</sub> H <sub>31</sub> NO <sub>4</sub>                 | C <sub>23</sub> H <sub>31</sub> NO <sub>4</sub>                 |
| Formula weight                                      | 385.49                                                          | 385.49                                                          |
| Temperature (K)                                     | 123(2)                                                          | 123(2)                                                          |
| Wavelength (Å)                                      | 1.54180                                                         | 1.54180                                                         |
| Crystal system                                      | Monoclinic                                                      | Monoclinic                                                      |
| Space group                                         | <i>P</i> 2 <sub>1</sub>                                         | <i>P</i> 2 <sub>1</sub>                                         |
| Unit cell dimensions                                |                                                                 |                                                                 |
| <i>a</i> (Å)                                        | 9.5769(1)                                                       | 7.6474(3)                                                       |
| <i>b</i> (Å)                                        | 9.8814(1)                                                       | 15.4448(5)                                                      |
| <i>c</i> (Å)                                        | 10.6257(1)                                                      | 9.2459(3)                                                       |
| $\beta$ (°)                                         | 93.098(1)                                                       | 111.210(4)                                                      |
| Volume (Å <sup>3</sup> )                            | 1004.074(17)                                                    | 1018.08(7)                                                      |
| <i>Z</i>                                            | 2                                                               | 2                                                               |
| Density (calculated) (Mg/m <sup>3</sup> )           | 1.275                                                           | 1.257                                                           |
| Absorption coefficient (mm <sup>-1</sup> )          | 0.693                                                           | 0.683                                                           |
| <i>F</i> (000)                                      | 416                                                             | 416                                                             |
| Crystal size (mm <sup>3</sup> )                     | 0.34 × 0.28 × 0.10                                              | 0.30 × 0.25 × 0.05                                              |
| Theta range for data collection (°)                 | 4.17 to 71.83.                                                  | 5.129 to 72.767.                                                |
| Index ranges                                        | -11 ≤ <i>h</i> ≤ 11, -12 ≤ <i>k</i> ≤ 11, -13 ≤ <i>l</i> ≤ 13   | -9 ≤ <i>h</i> ≤ 6, -18 ≤ <i>k</i> ≤ 18, -11 ≤ <i>l</i> ≤ 11     |
| Reflections collected                               | 13014                                                           | 4100                                                            |
| Independent reflections                             | 3655 [R(int) = 0.0133]                                          | 3103 [R(int) = 0.0136]                                          |
| Completeness to theta = 70.00°                      | 99.7 %                                                          | 99.7 %                                                          |
| Absorption correction                               | Semi-empirical from equivalents                                 | Semi-empirical from equivalents                                 |
| Max. and min. transmission                          | 1.00000 and 0.68513                                             | 1.00000 and 0.34559                                             |
| Refinement method                                   | Full-matrix least-squares on <i>F</i> <sup>2</sup>              | Full-matrix least-squares on <i>F</i> <sup>2</sup>              |
| Data / restraints / parameters                      | 3655 / 1 / 257                                                  | 3103 / 1 / 257                                                  |
| Goodness-of-fit on <i>F</i> <sup>2</sup>            | 1.045                                                           | 1.044                                                           |
| Final <i>R</i> indices [ <i>I</i> > 2σ( <i>I</i> )] | <i>R</i> <sub>1</sub> = 0.0316, <i>wR</i> <sub>2</sub> = 0.0850 | <i>R</i> <sub>1</sub> = 0.0382, <i>wR</i> <sub>2</sub> = 0.1028 |
| <i>R</i> indices (all data)                         | <i>R</i> <sub>1</sub> = 0.0319, <i>wR</i> <sub>2</sub> = 0.0853 | <i>R</i> <sub>1</sub> = 0.0384, <i>wR</i> <sub>2</sub> = 0.1034 |
| Absolute structure parameter                        | -0.01(13)                                                       | 0.17(11)                                                        |
| Largest diff. peak and hole                         | 0.260 and -0.153 e.Å <sup>-3</sup>                              | 0.300 and -0.227 e.Å <sup>-3</sup>                              |

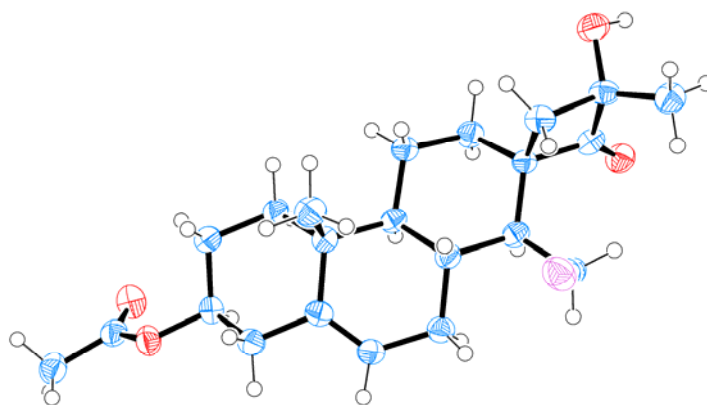

**Figure S8.** Ortep Diagram of Compound **3** with 50% Probability Ellipsoid.

**Table S7.** Crystal data and structure refinement for compound **3**.

|                                            |                                                                 |
|--------------------------------------------|-----------------------------------------------------------------|
| Empirical formula                          | C <sub>23</sub> H <sub>31</sub> NO <sub>4</sub>                 |
| Formula weight                             | 385.49                                                          |
| Temperature                                | 123(2) K                                                        |
| Wavelength                                 | 1.54180 Å                                                       |
| Crystal system                             | Orthorhombic                                                    |
| Space group                                | <i>P</i> 2 <sub>1</sub> 2 <sub>1</sub> 2 <sub>1</sub>           |
| Unit cell dimensions                       |                                                                 |
| <i>a</i> (Å)                               | 7.7874(13)                                                      |
| <i>b</i> (Å)                               | 9.0718(19)                                                      |
| <i>c</i> (Å)                               | 28.882(6)                                                       |
| Volume (Å <sup>3</sup> )                   | 2040.4(7)                                                       |
| <i>Z</i>                                   | 4                                                               |
| Density (calculated) (Mg/m <sup>3</sup> )  | 1.255                                                           |
| Absorption coefficient (mm <sup>-1</sup> ) | 0.682                                                           |
| <i>F</i> (000)                             | 832                                                             |
| Crystal size (mm <sup>3</sup> )            | 0.28 × 0.20 × 0.05                                              |
| Theta range for data collection            | 5.11 to 67.95°.                                                 |
| Index ranges                               | -8 ≤ <i>h</i> ≤ 9, -10 ≤ <i>k</i> ≤ 10, -34 ≤ <i>l</i> ≤ 34     |
| Reflections collected                      | 10623                                                           |
| Independent reflections                    | 3627 [R(int) = 0.0645]                                          |
| Completeness to theta = 67.95°             | 99.0 %                                                          |
| Absorption correction                      | Semi-empirical from equivalents                                 |
| Max. and min. transmission                 | 1.00000 and 0.88181                                             |
| Refinement method                          | Full-matrix least-squares on <i>F</i> <sup>2</sup>              |
| Data / restraints / parameters             | 3627 / 0 / 260                                                  |
| Goodness-of-fit on <i>F</i> <sup>2</sup>   | 0.865                                                           |
| Final <i>R</i> indices [I > 2σ(I)]         | <i>R</i> <sub>1</sub> = 0.0492, <i>wR</i> <sub>2</sub> = 0.0856 |
| <i>R</i> indices (all data)                | <i>R</i> <sub>1</sub> = 0.1113, <i>wR</i> <sub>2</sub> = 0.1073 |
| Absolute structure parameter               | 0.0(4)                                                          |
| Largest diff. peak and hole                | 0.225 and -0.258 e.Å <sup>-3</sup>                              |

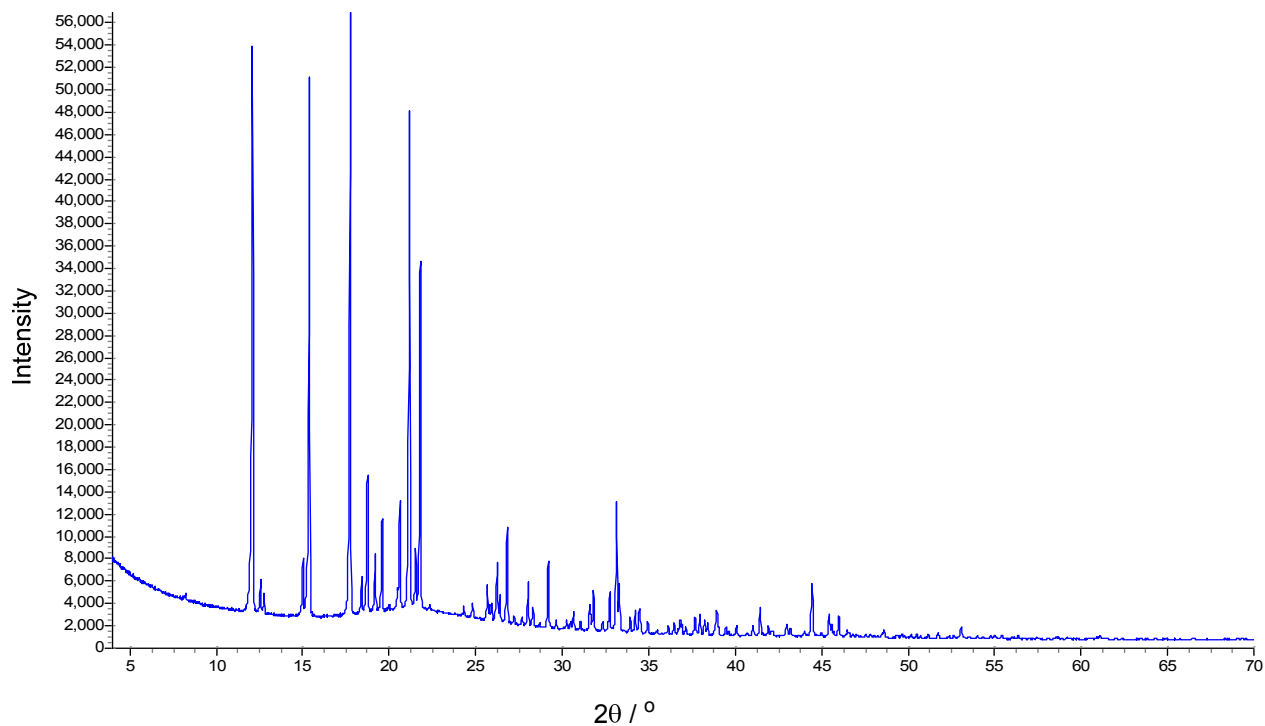

**Figure S9.** Powder X-ray diffraction pattern before irradiation of polymorph 1A

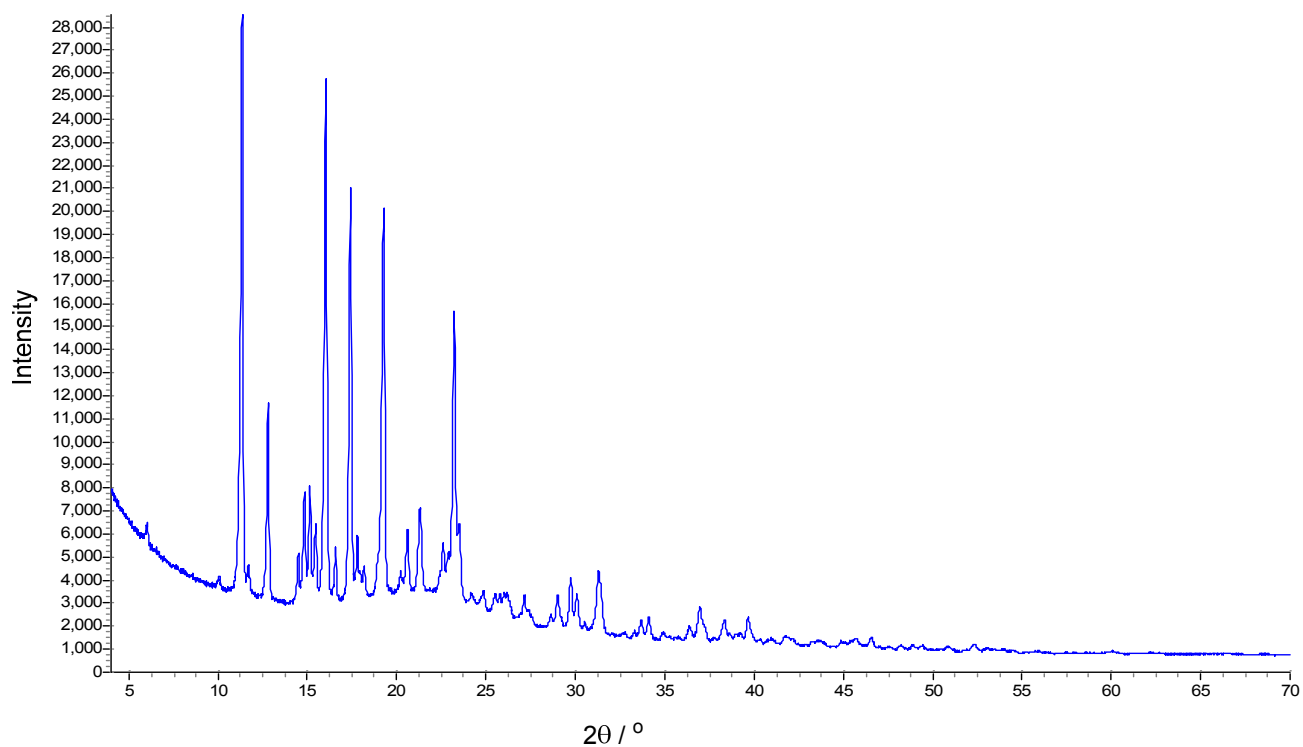

**Figure S10.** Powder X-ray diffraction pattern after irradiation of polymorph 1A

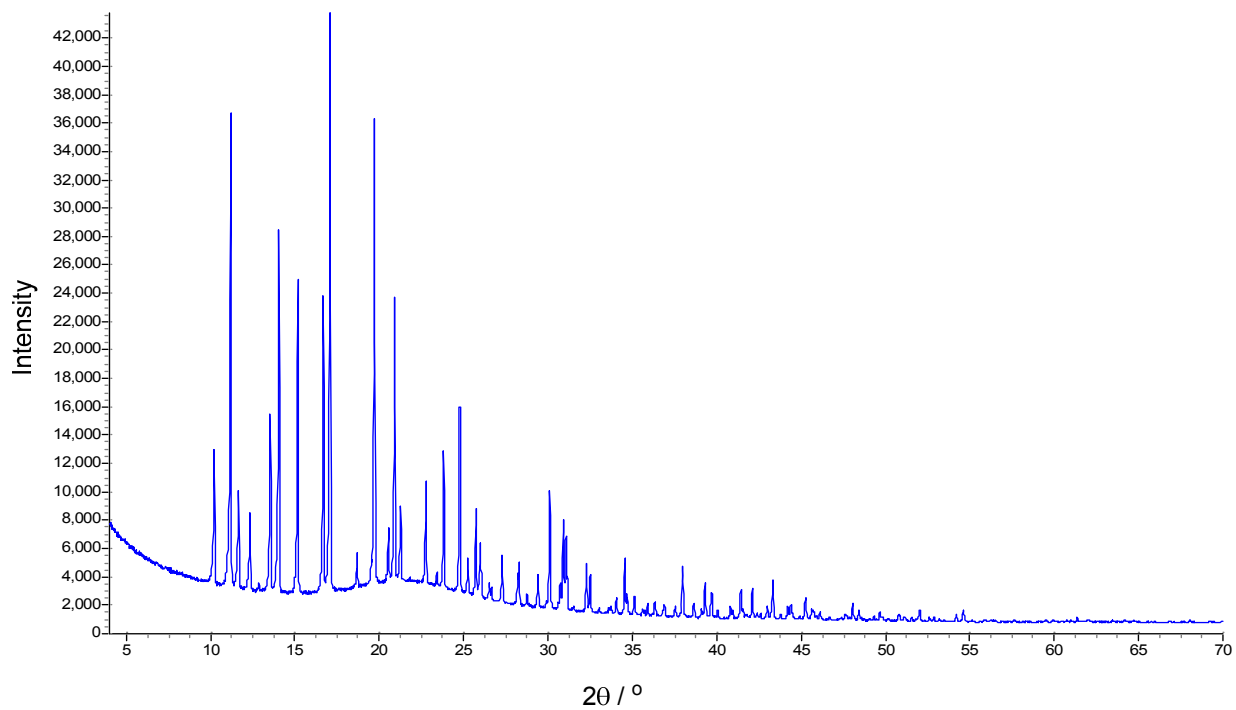

**Figure S11.** Powder X-ray diffraction pattern before irradiation of polymorph **1B**

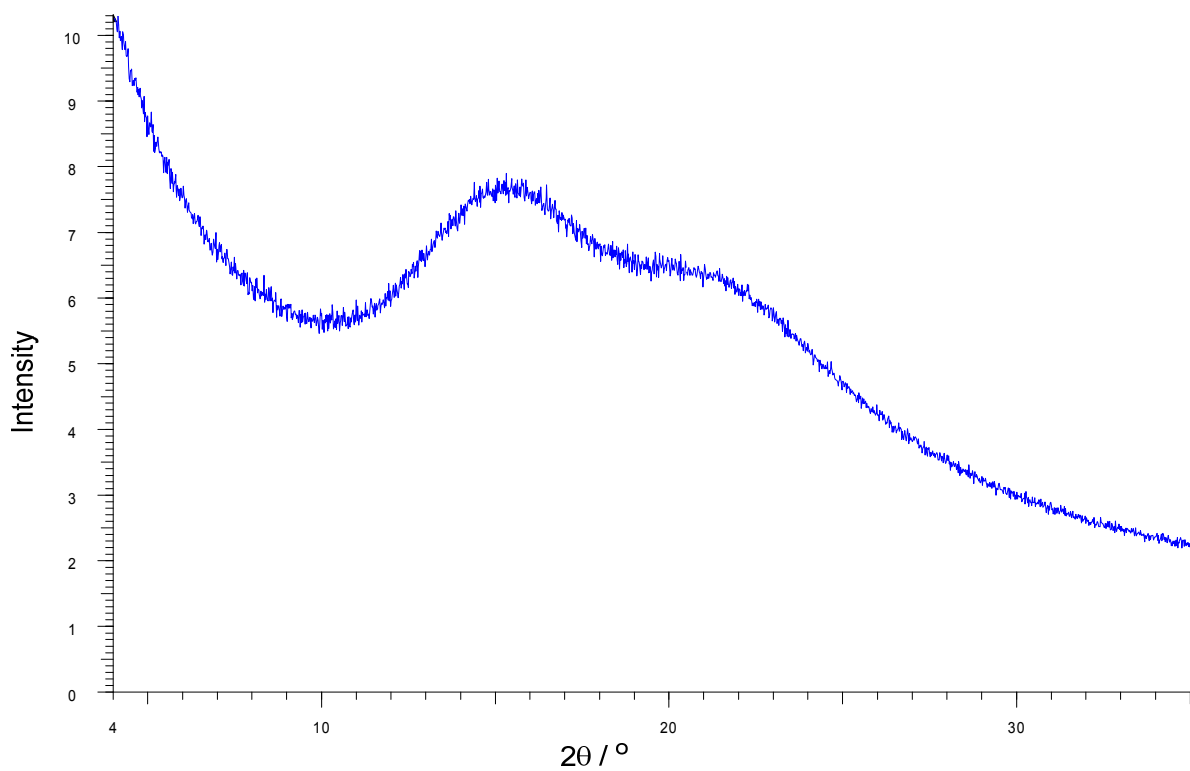

**Figure S12.** Powder X-ray diffraction pattern after irradiation of polymorph **1B**, run truncated at 35 2θ / °, as no Bragg diffraction evident

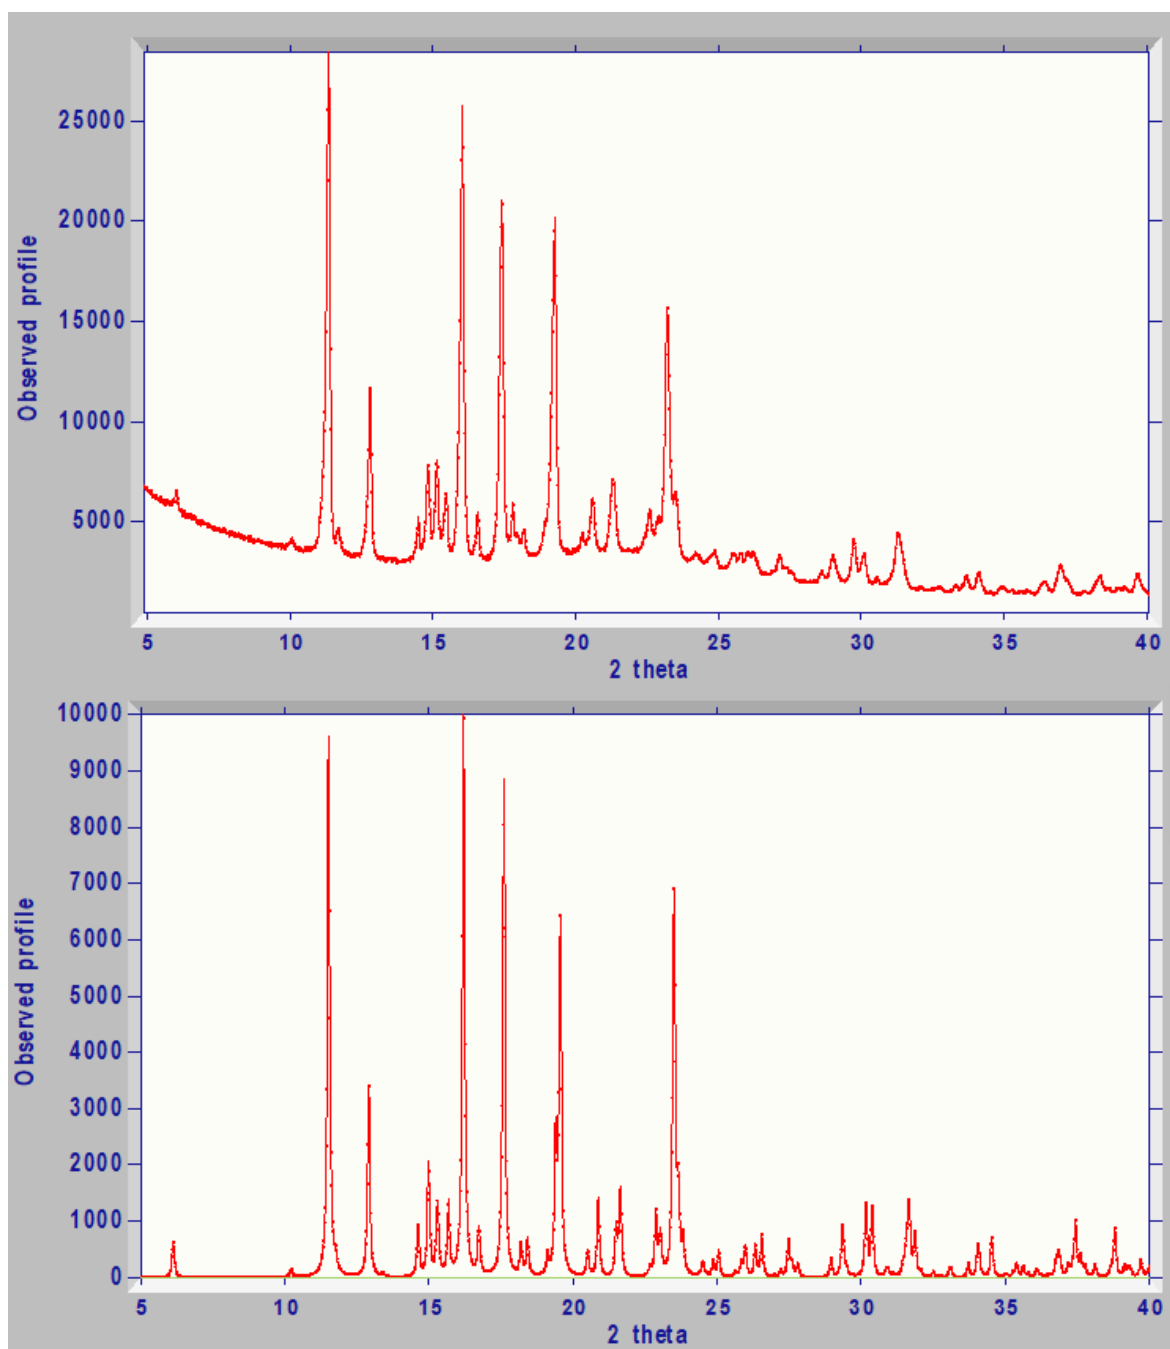

**Figure S13.** Powder X-ray diffraction pattern of polymorph **1A** at room temperature (upper) after irradiation and simulated powder X-ray diffraction pattern of **3** at 123 K (lower) in the range 5-40° 2 $\theta$ , showing excellent agreement. Small changes in peak positions are attributable to the temperature difference between the two datasets.

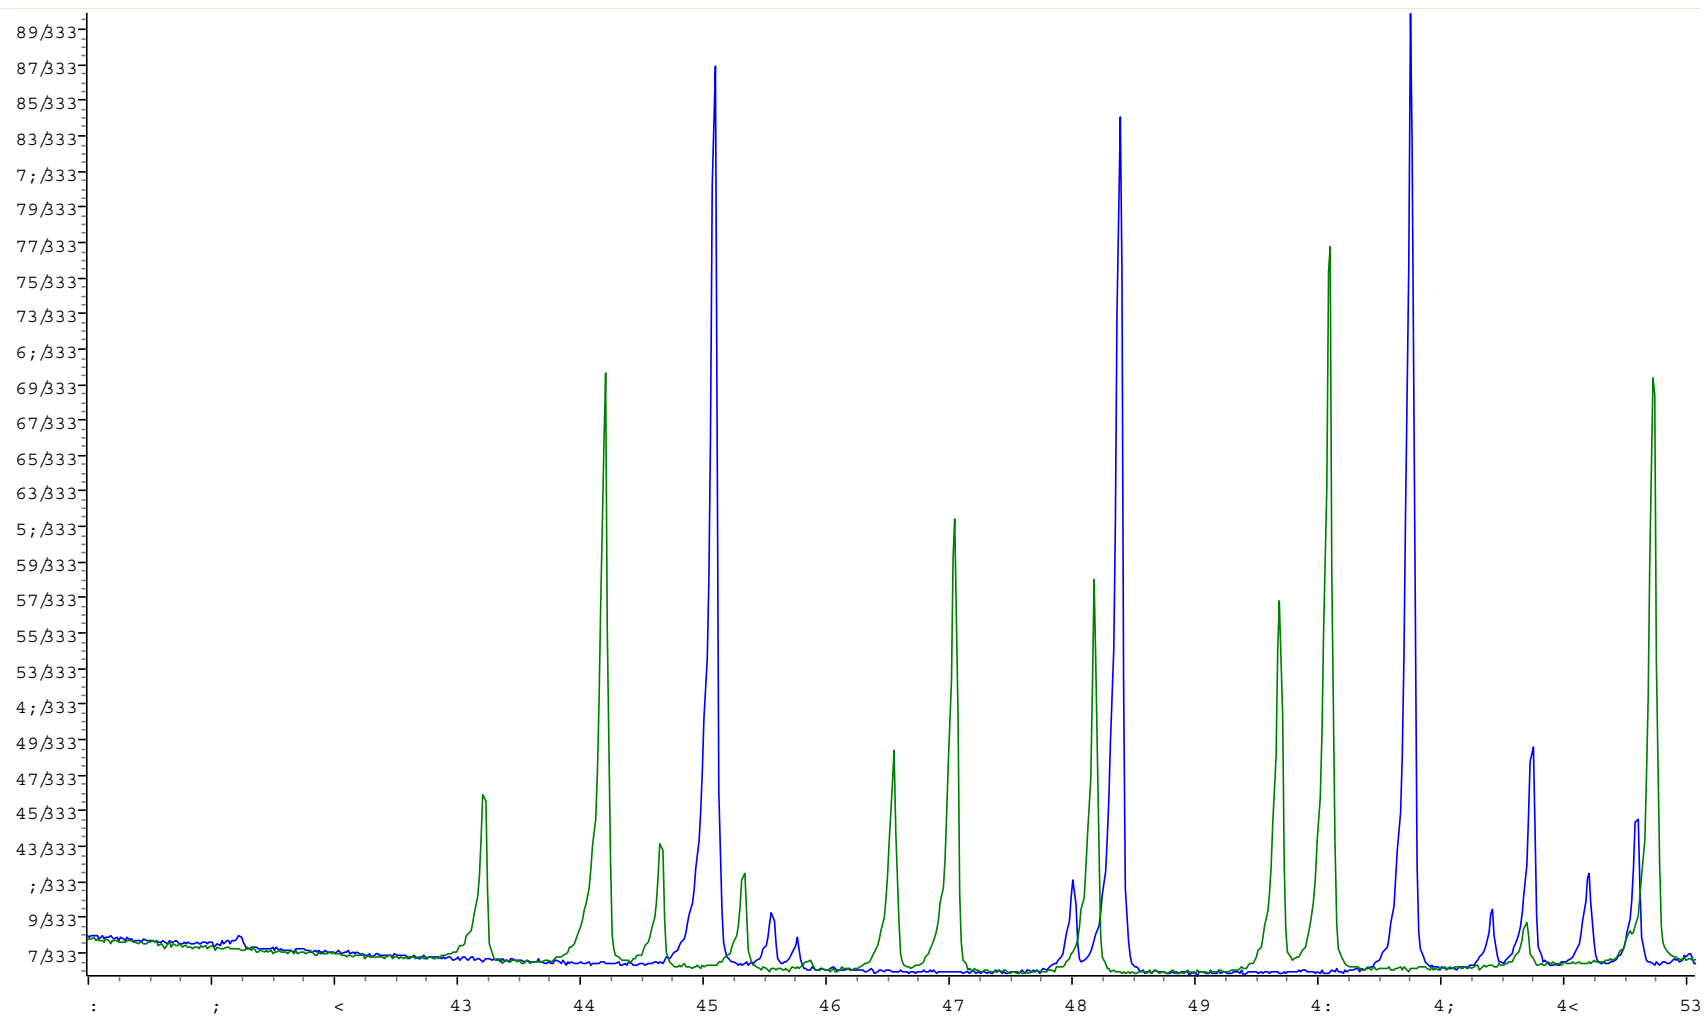

**Figure S14.** Powder X-ray diffraction patterns of polymorphs **1A** (blue) and **1B** (green) in the range 7-20°  $2\theta$ , before irradiation

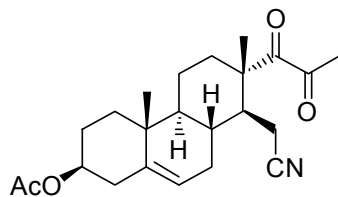

1

<sup>1</sup>H NMR (400 MHz, CDCl<sub>3</sub>)

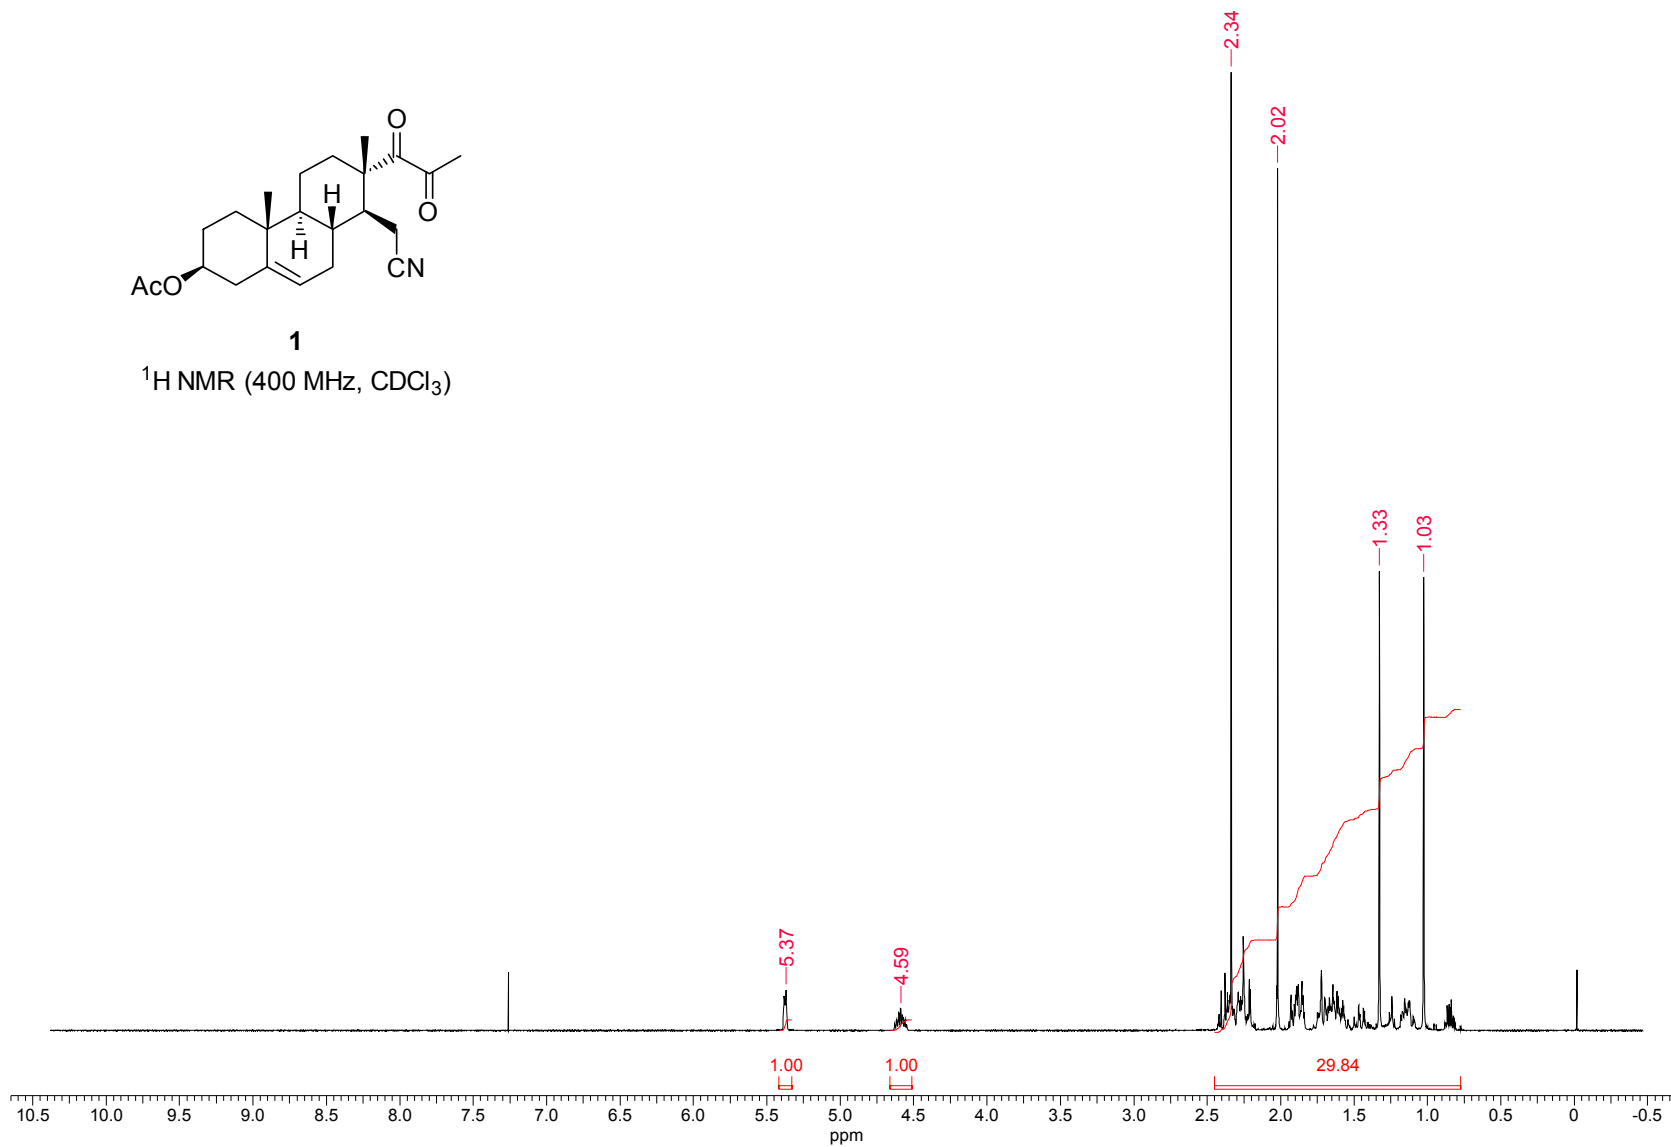

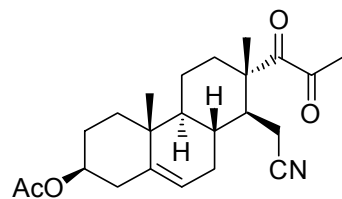

1

$^{13}\text{C}\{^1\text{H}\}$  NMR (100.4 MHz,  $\text{CDCl}_3$ )

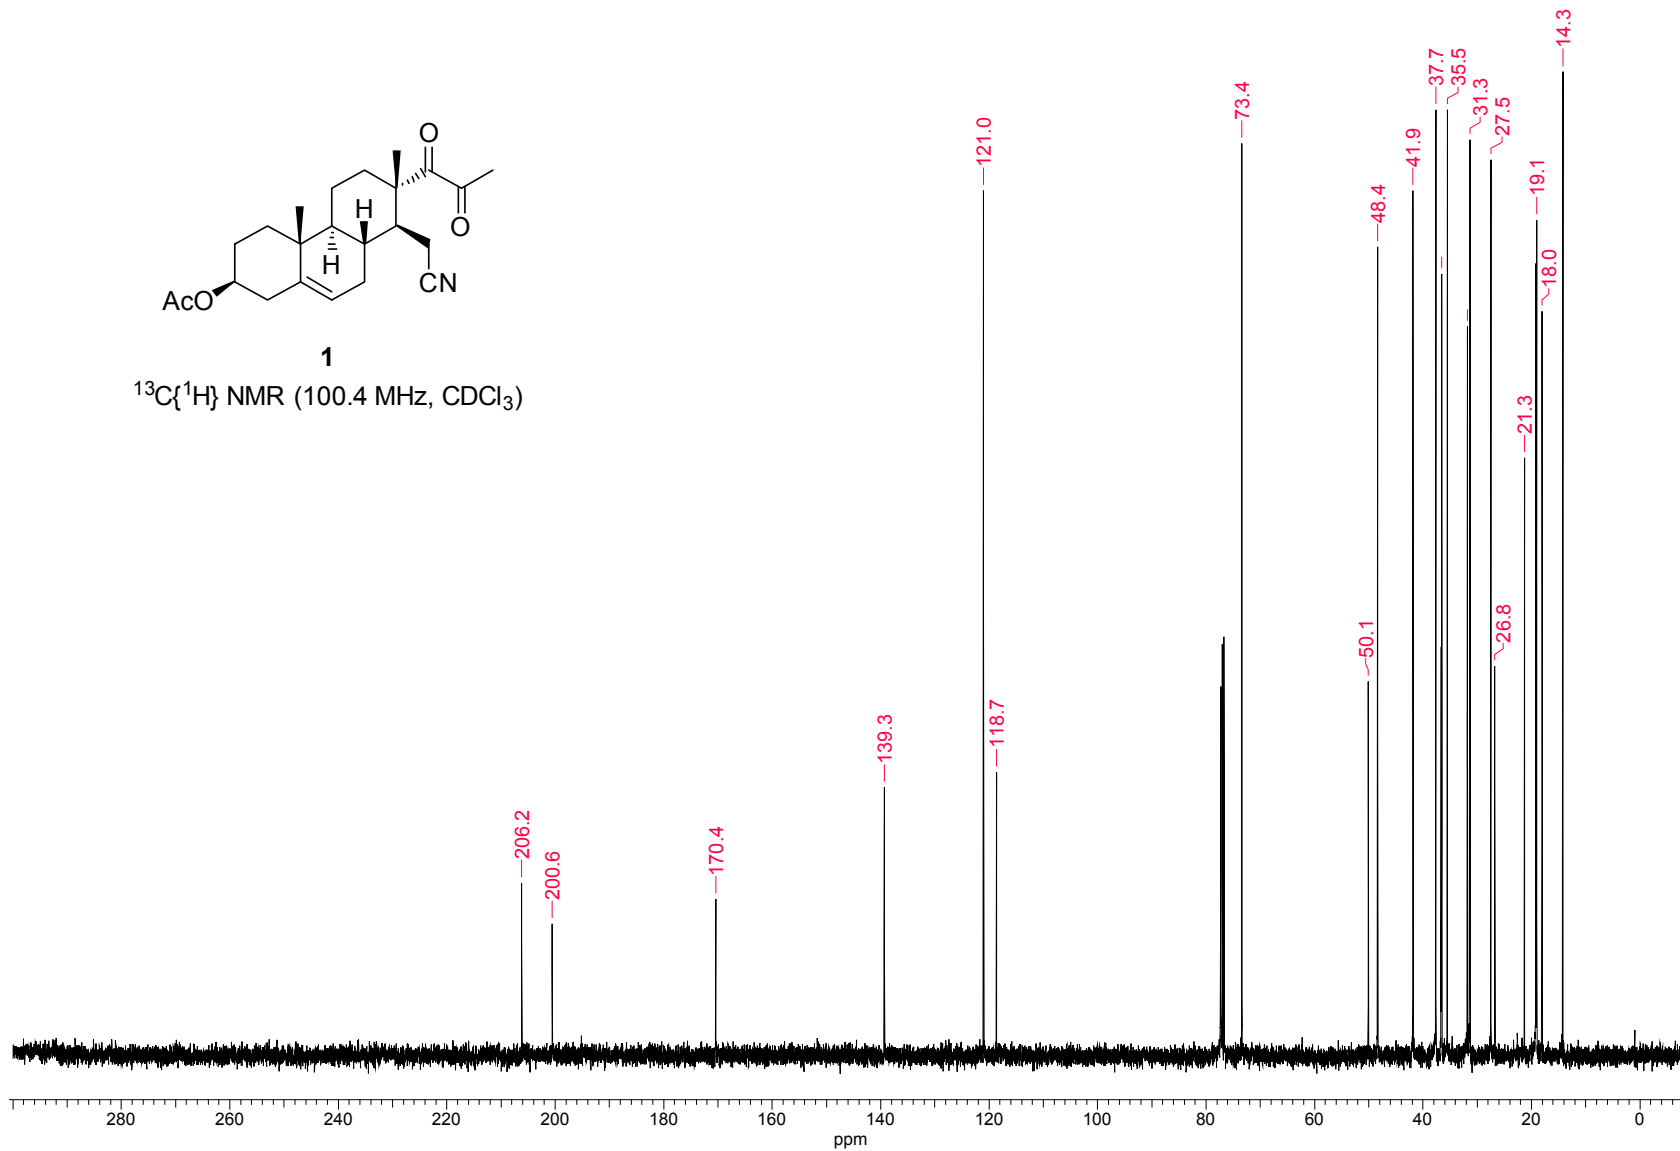





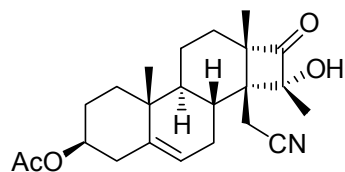

**2**

$^{13}\text{C}\{^1\text{H}\}$  NMR (125.7 MHz,  $\text{CDCl}_3$ )

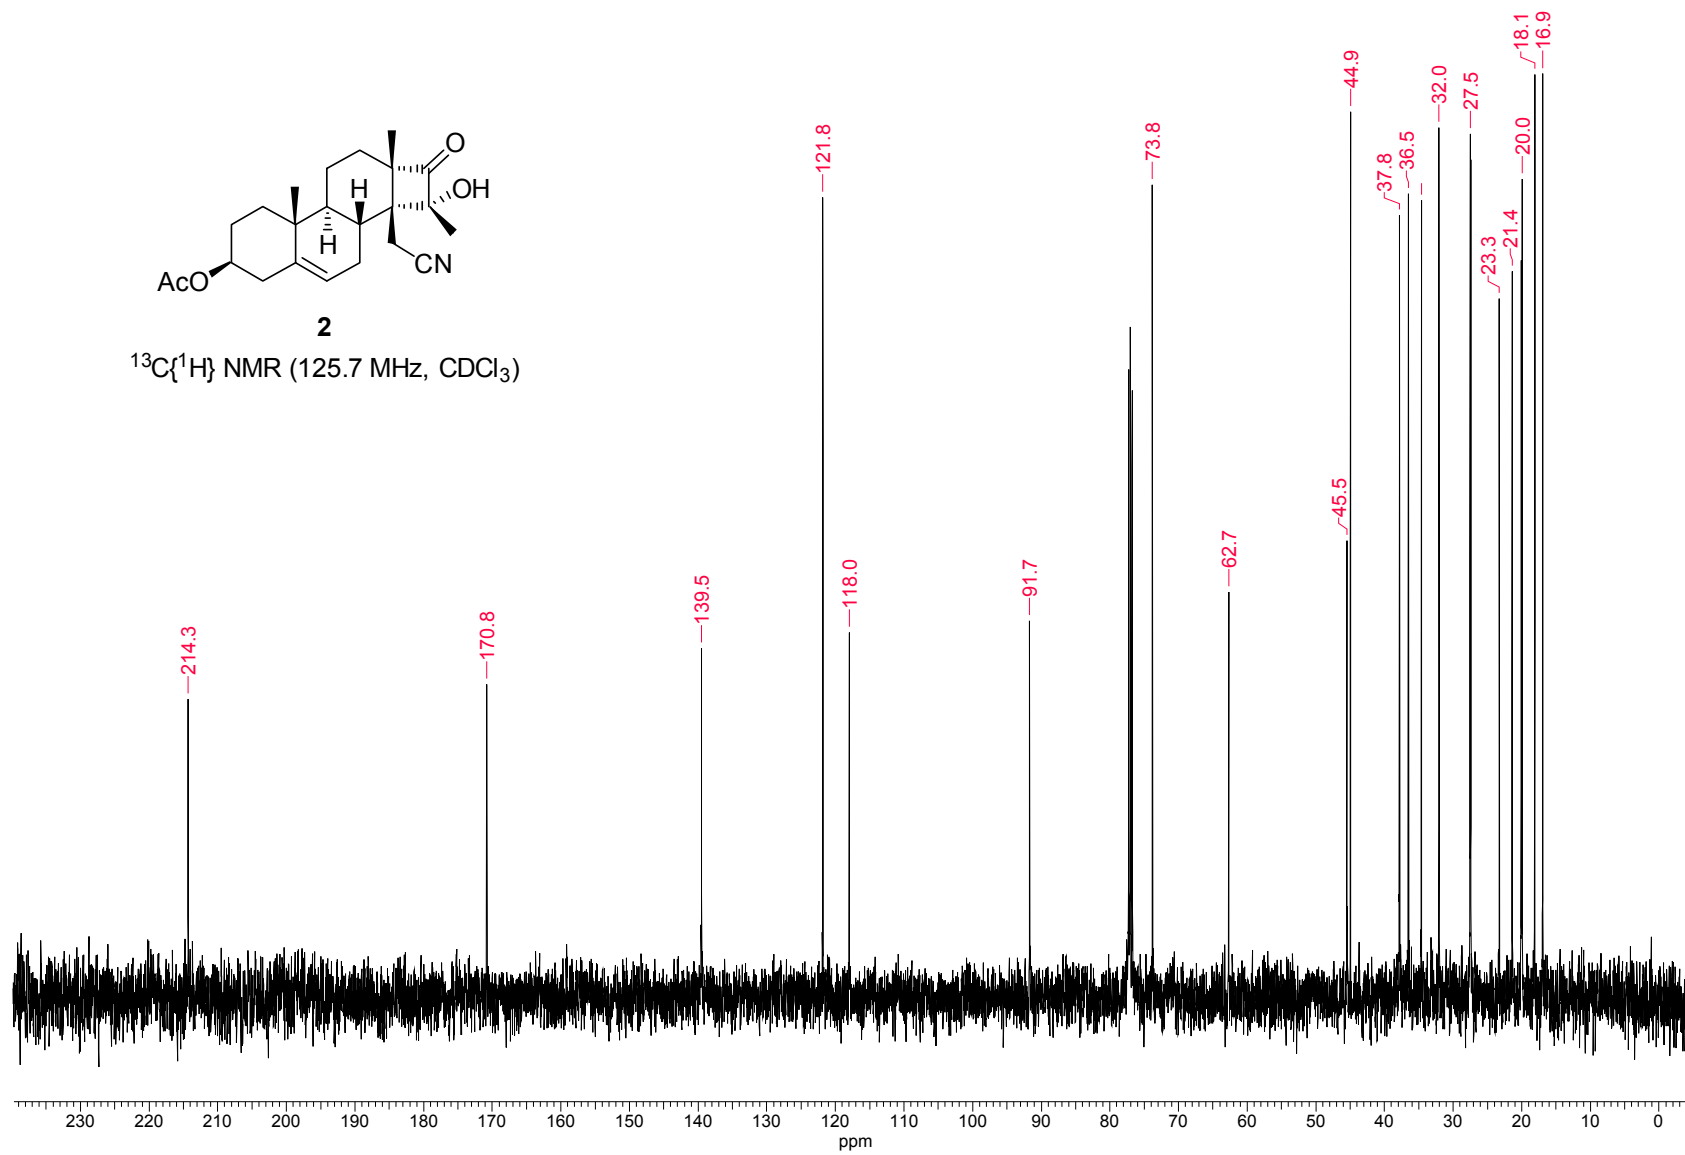

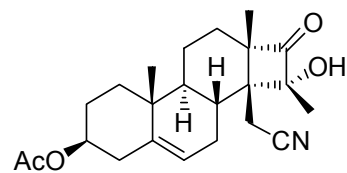

**2**

DEPT90 (125.7 MHz, CDCl<sub>3</sub>)

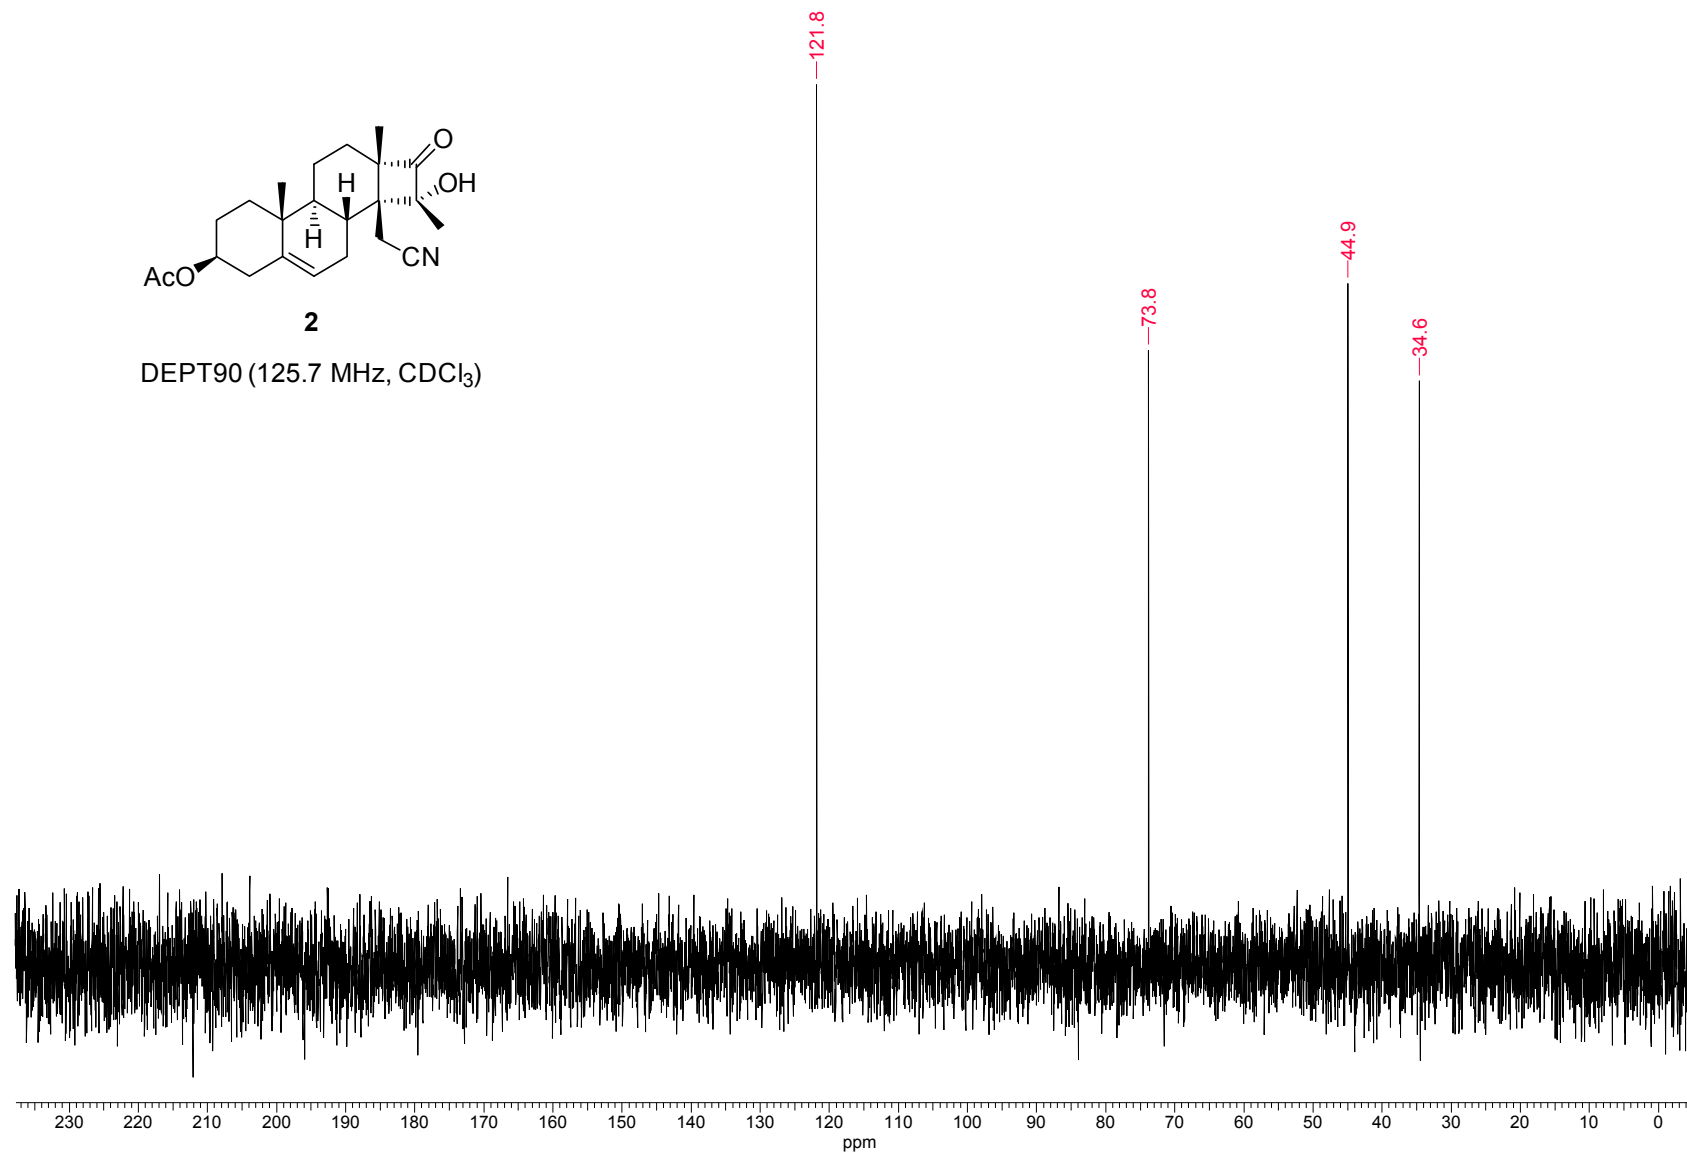

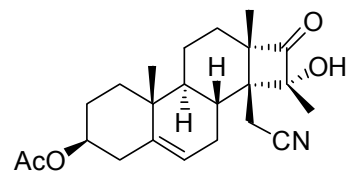

**2**

DEPT135 (125.7 MHz, CDCl<sub>3</sub>)

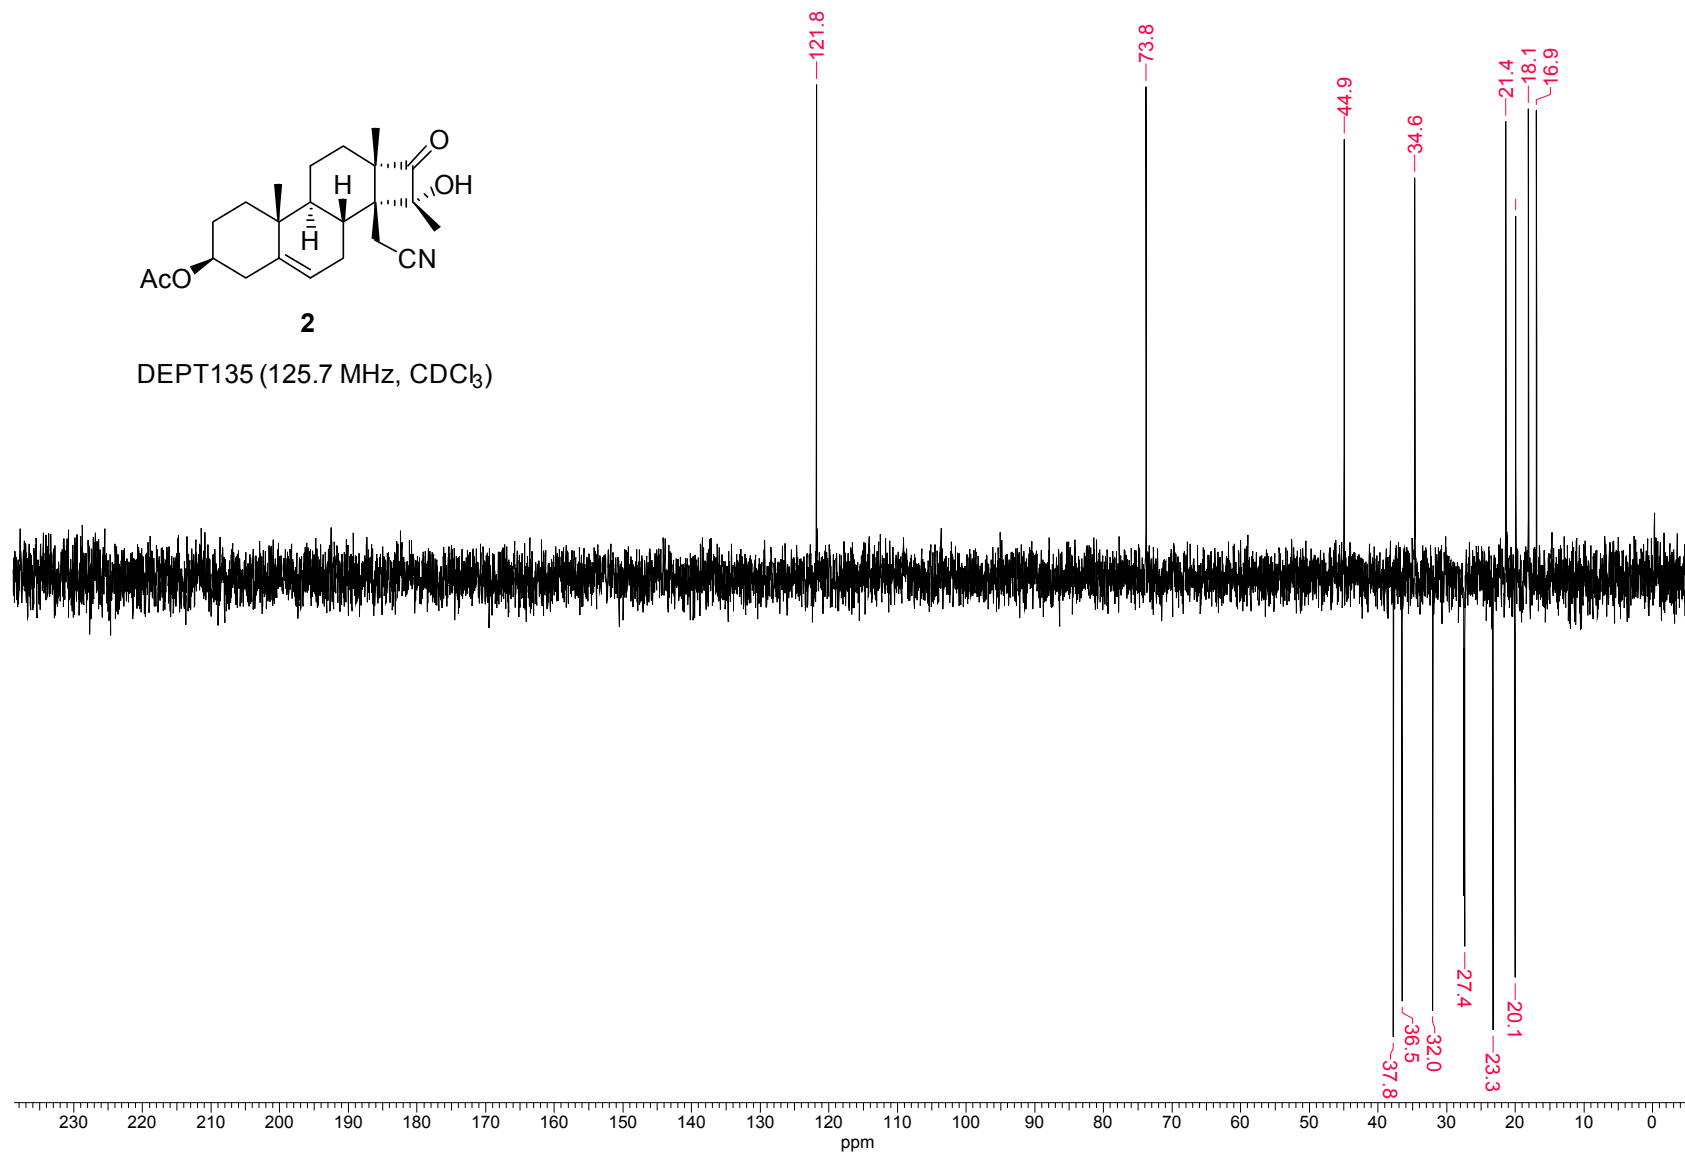

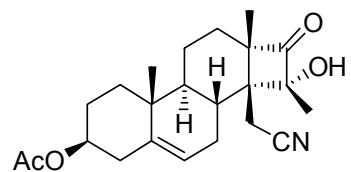

**2**

COSY (500 MHz, CDCl<sub>3</sub>)

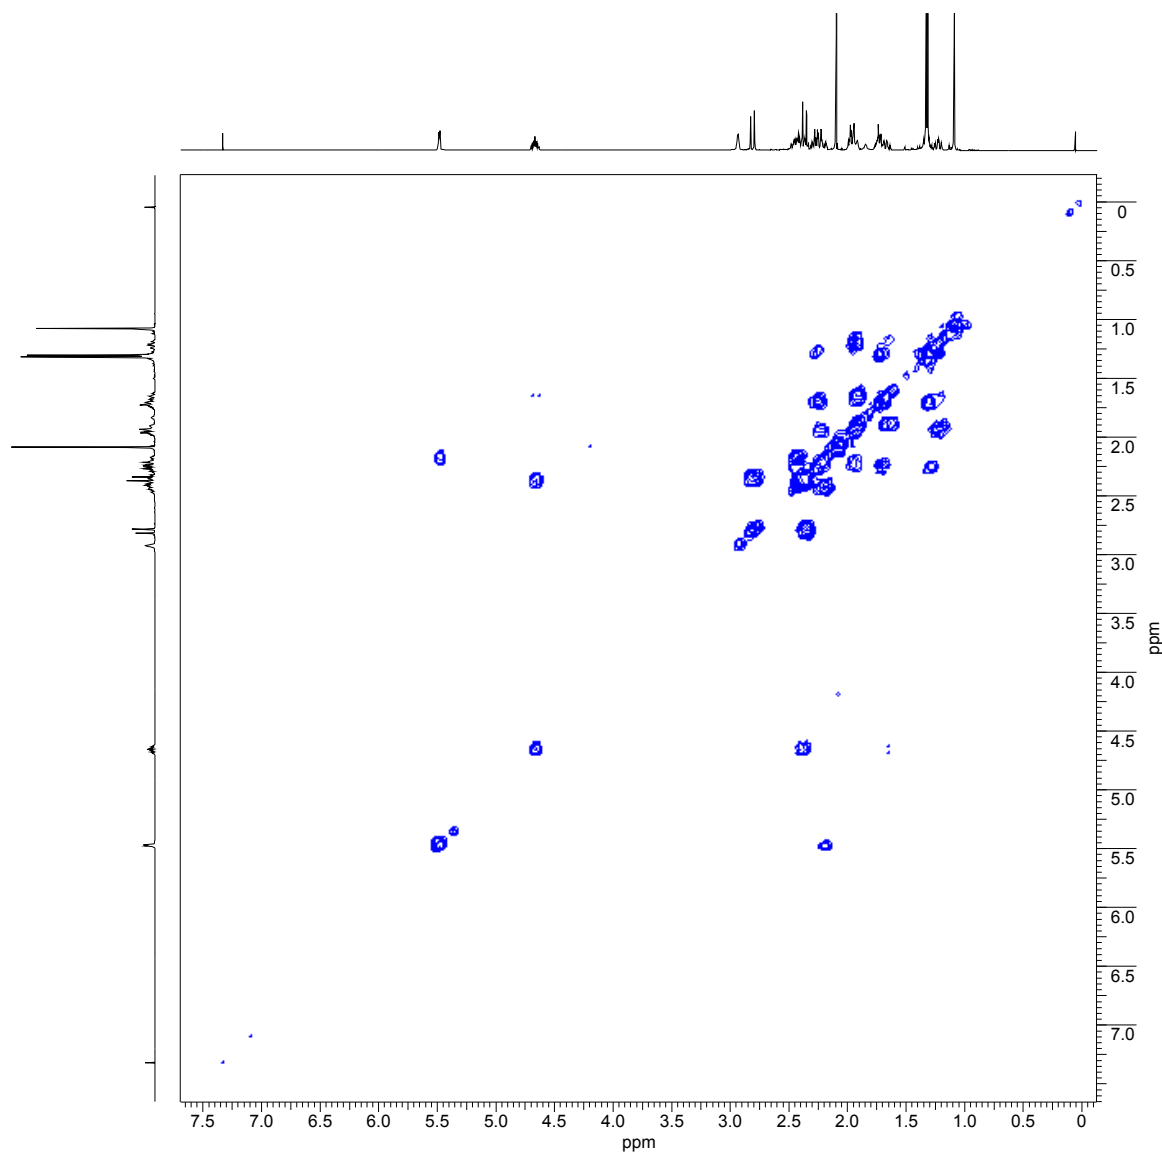

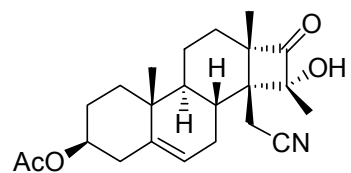

2

NOESY (500 MHz, CDCl<sub>3</sub>)

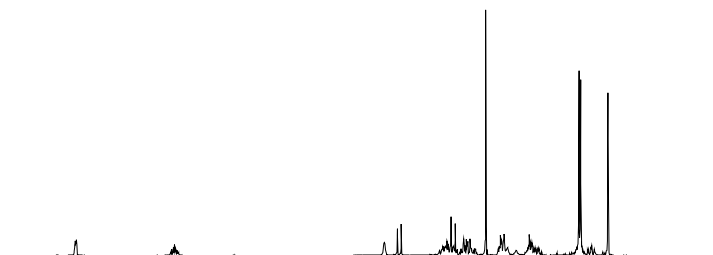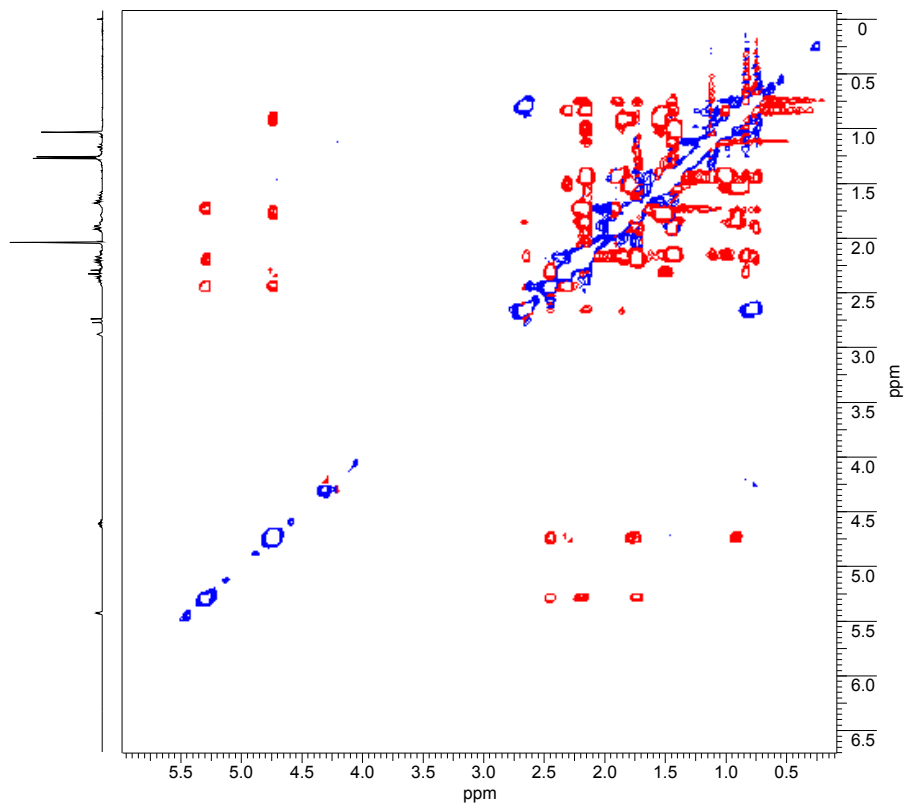

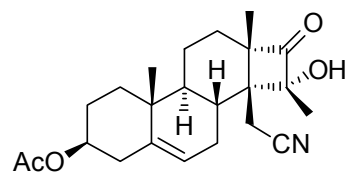

**2**

HSQC (CDCl<sub>3</sub>)

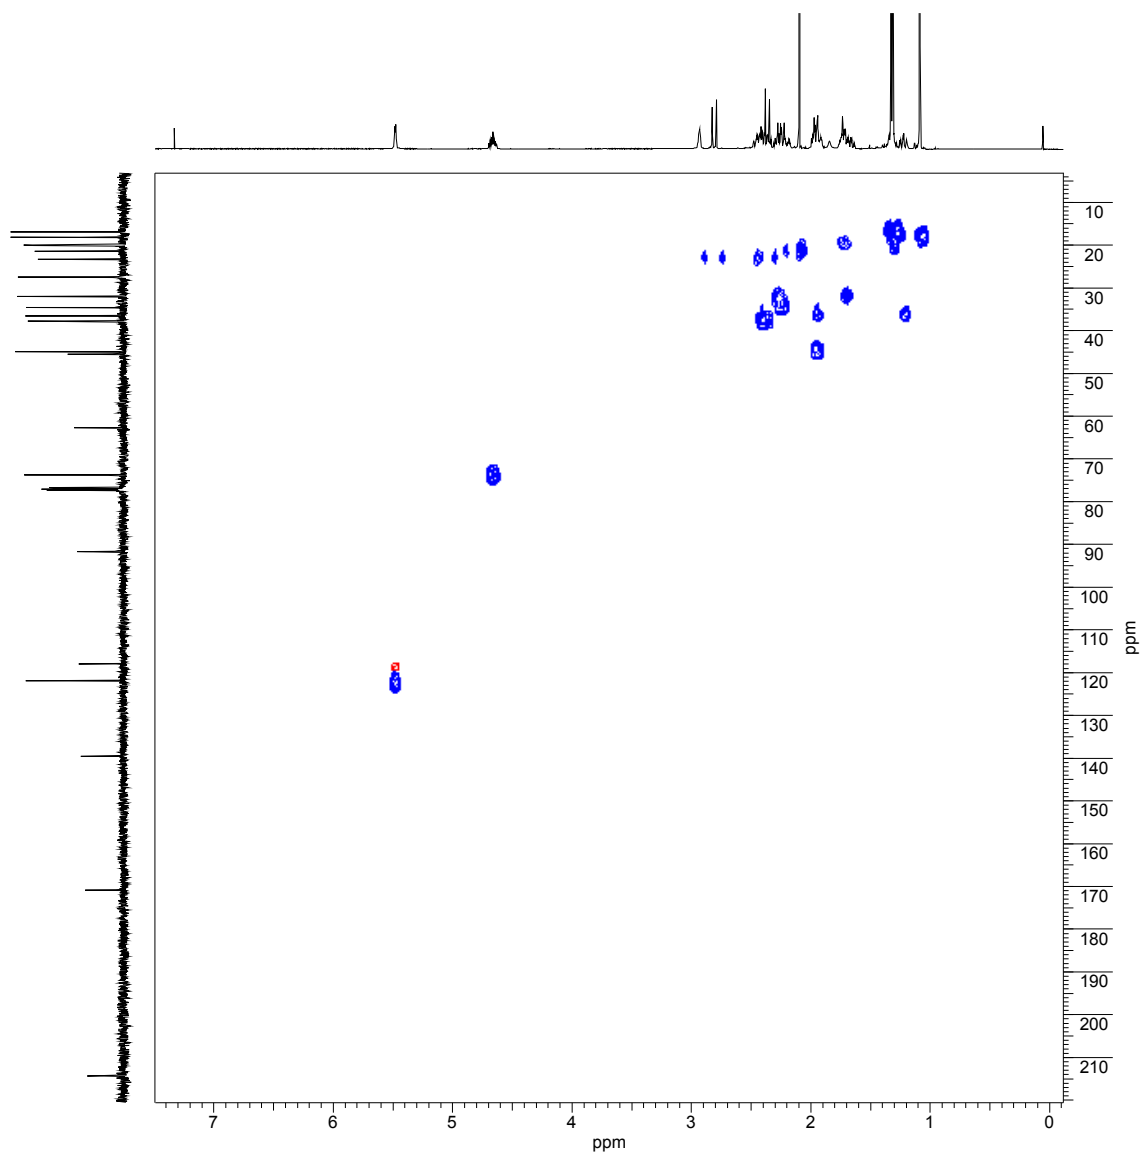

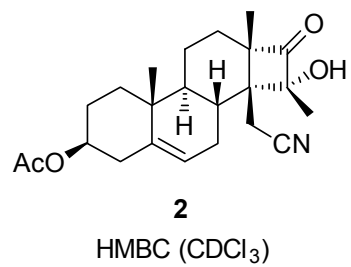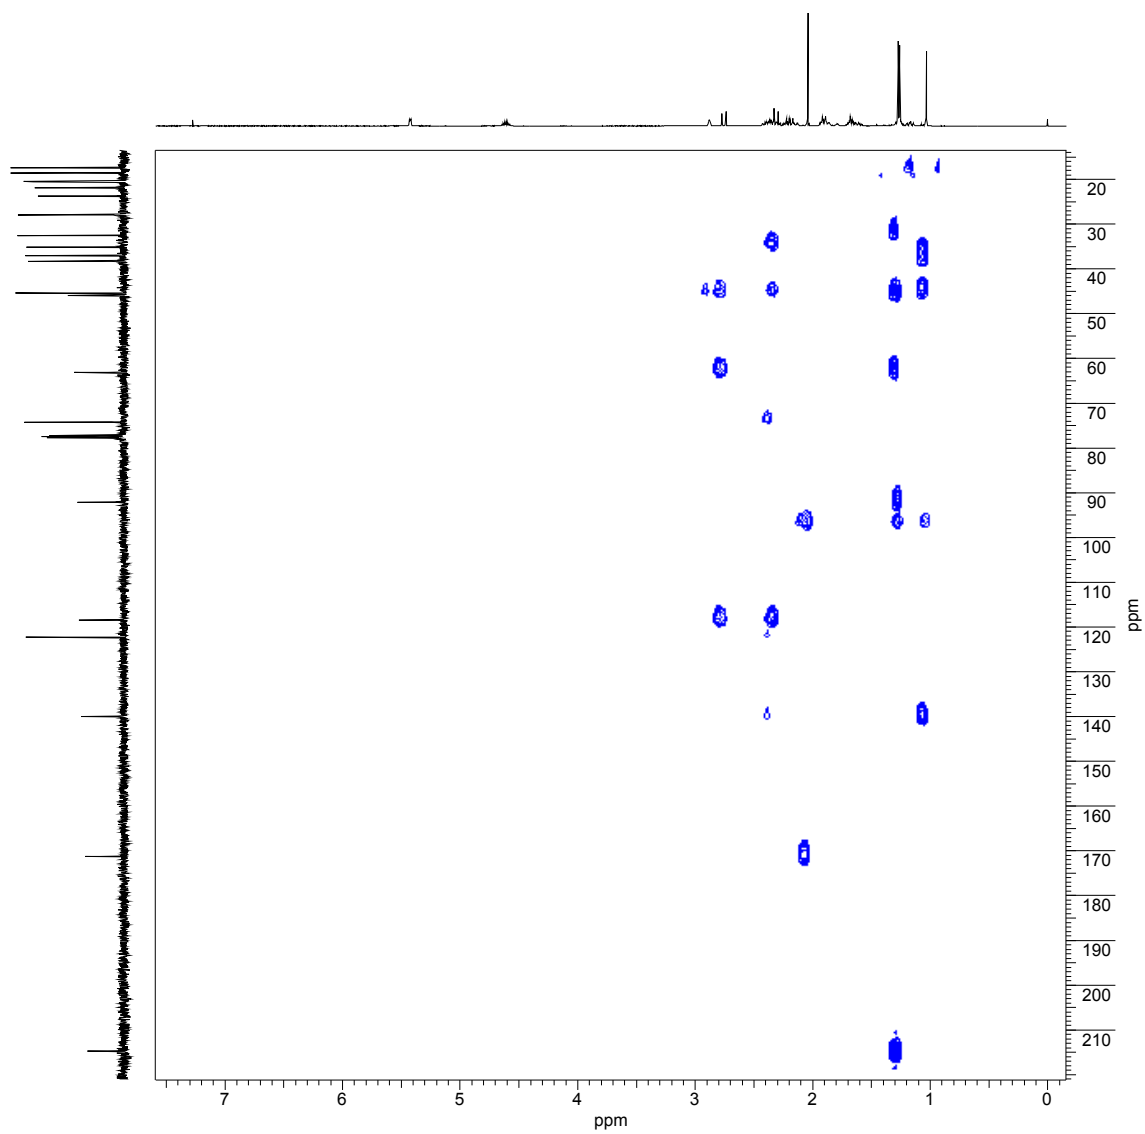



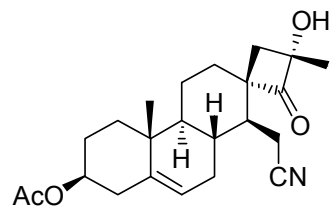

**3**

$^1\text{H}$  NMR (500 MHz,  $\text{CDCl}_3$ )

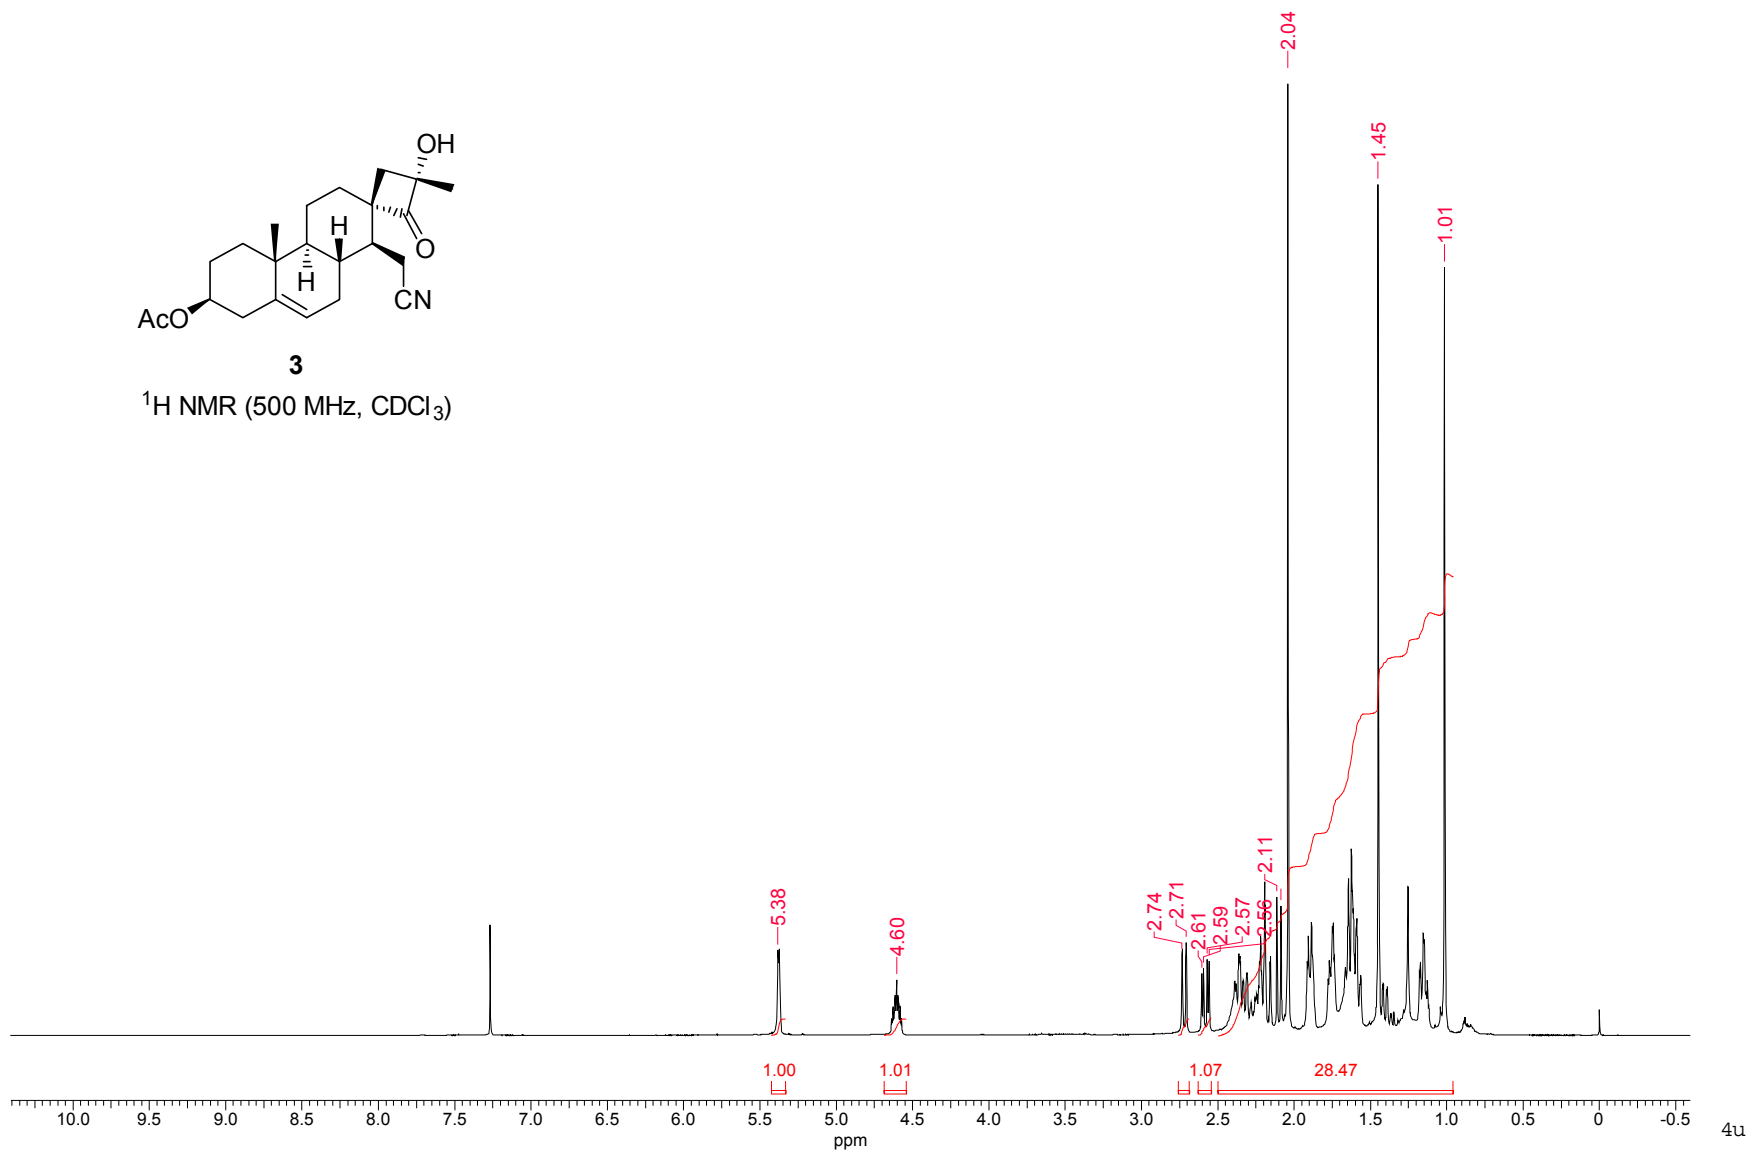

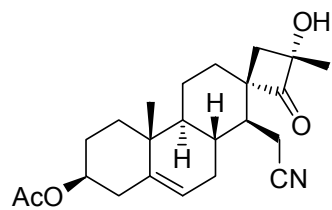

**3**

$^{13}\text{C}\{^1\text{H}\}$  NMR (100.4 MHz,  $\text{CDCl}_3$ )

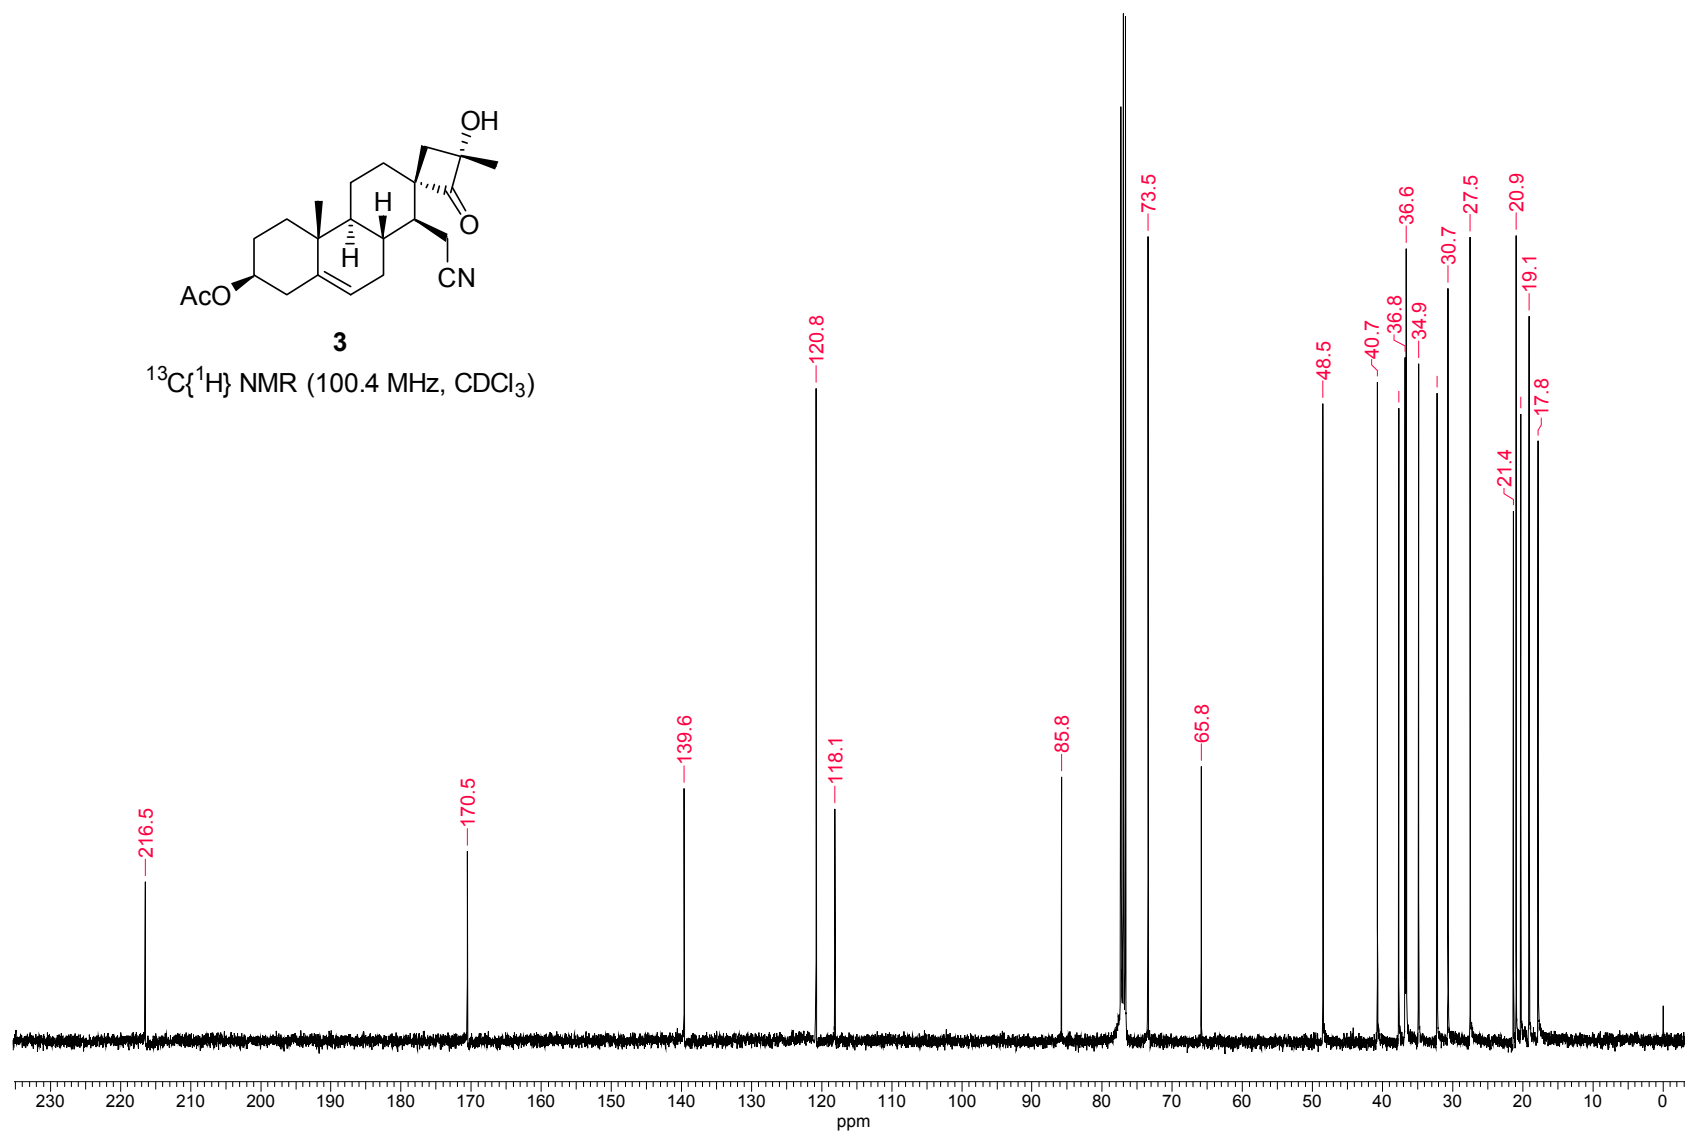

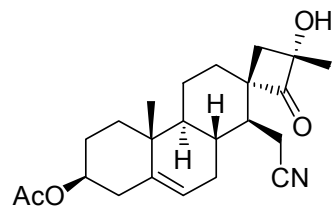

**3**

DEPT90 (100.4 MHz, CDCl<sub>3</sub>)

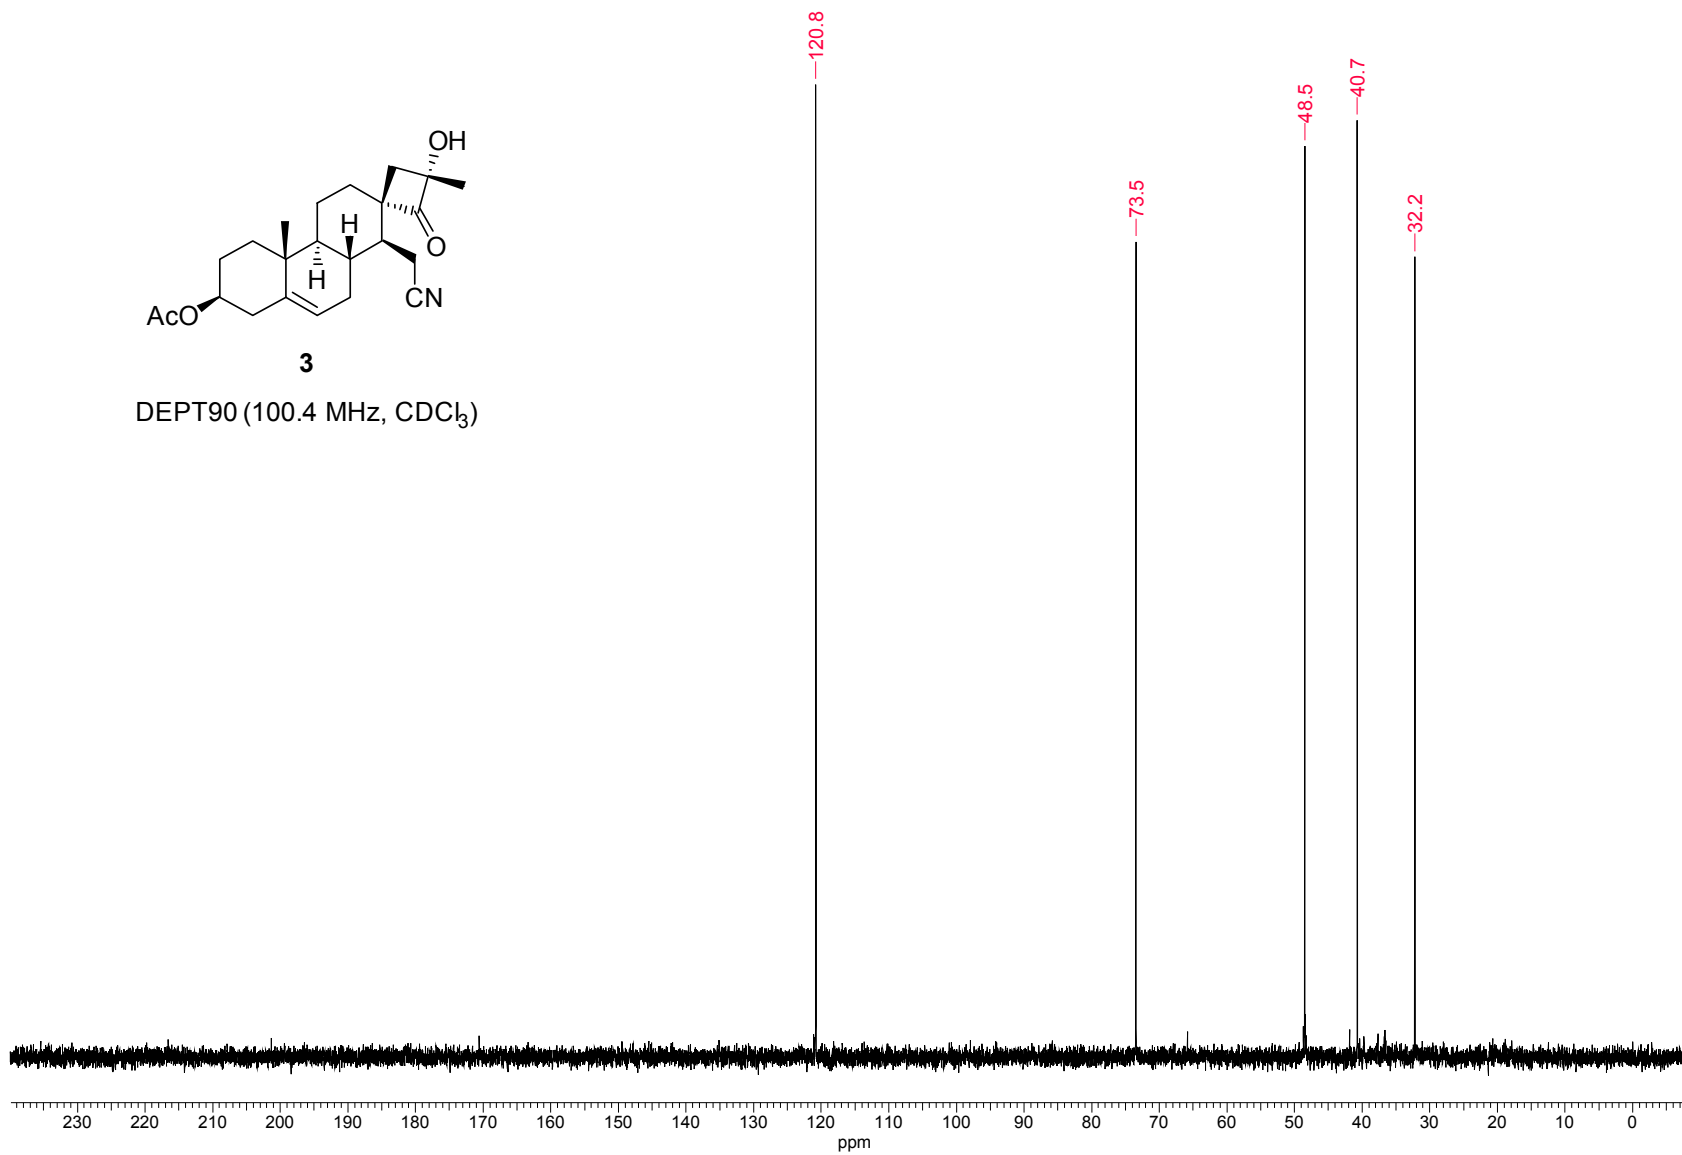

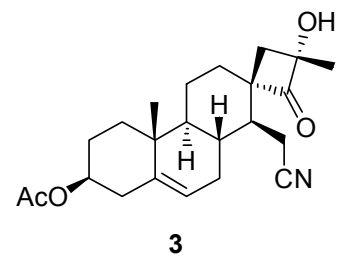

DEPT135 (100.4 MHz, CDCl<sub>3</sub>)

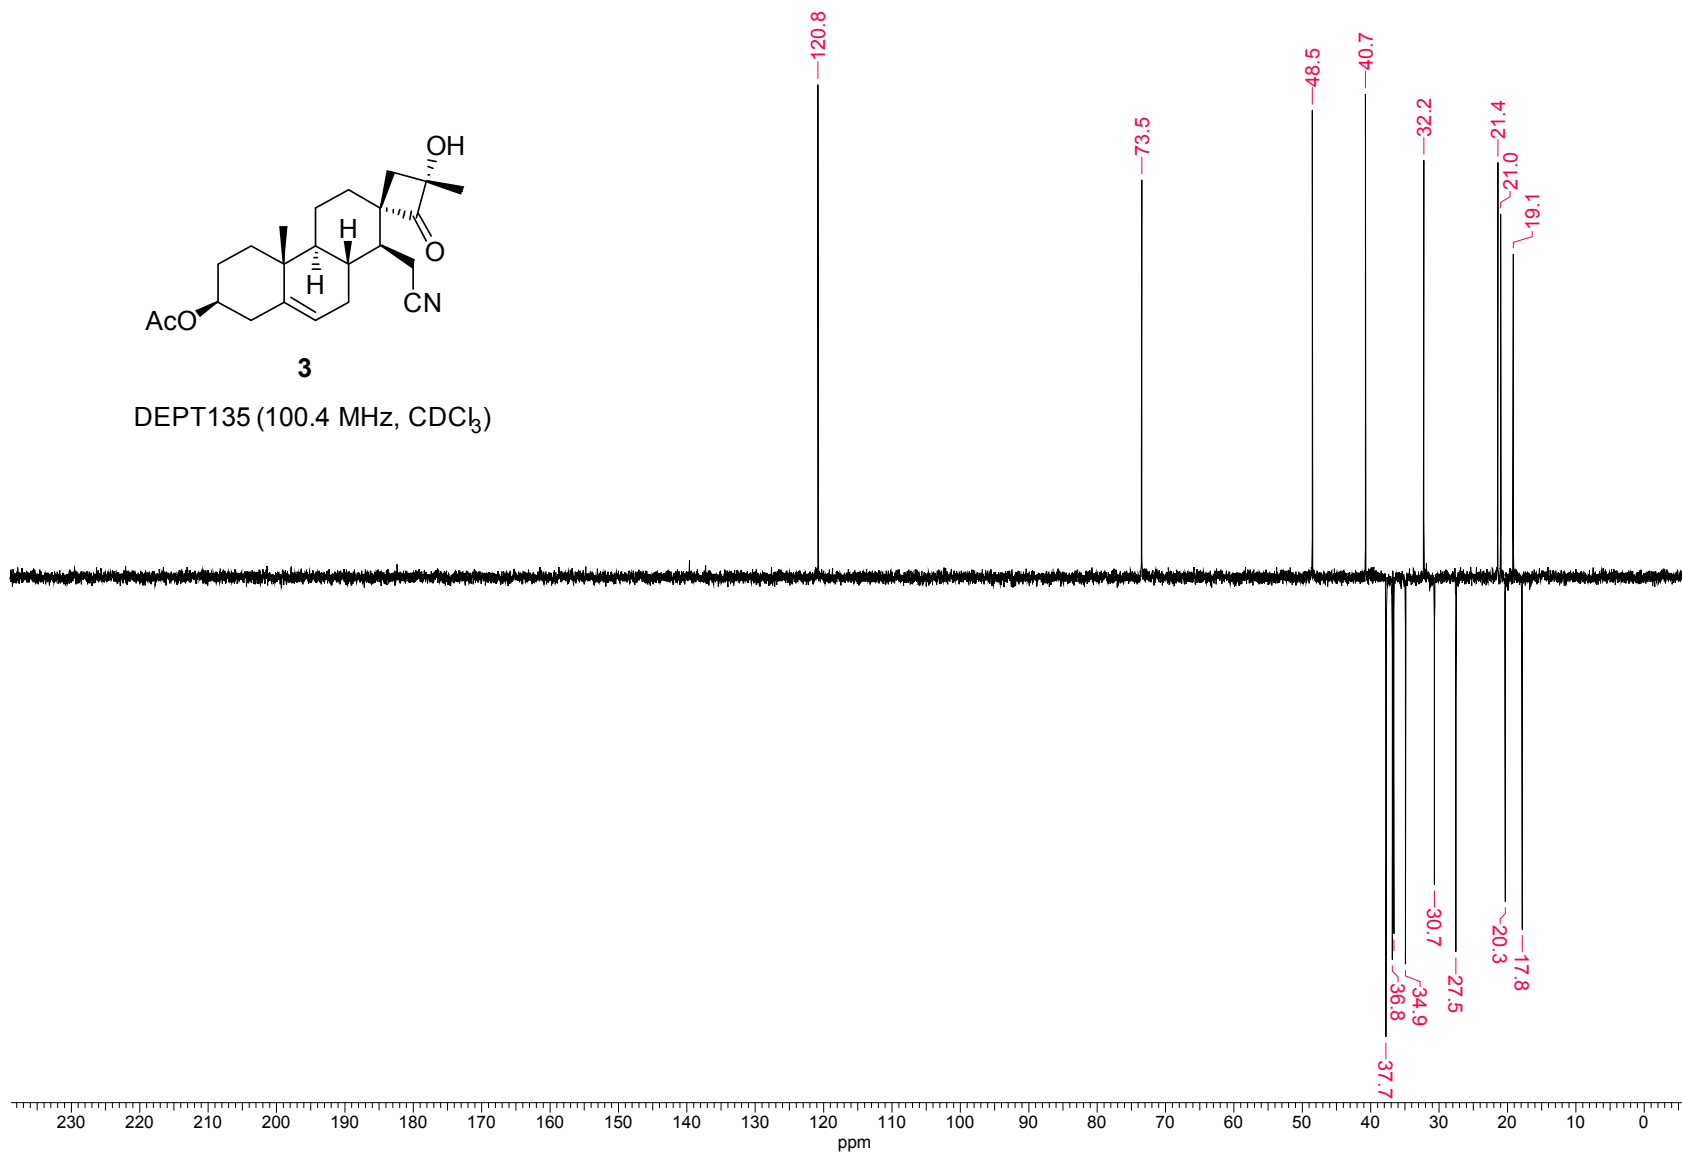

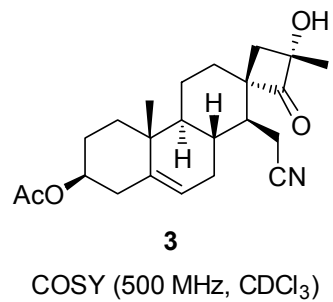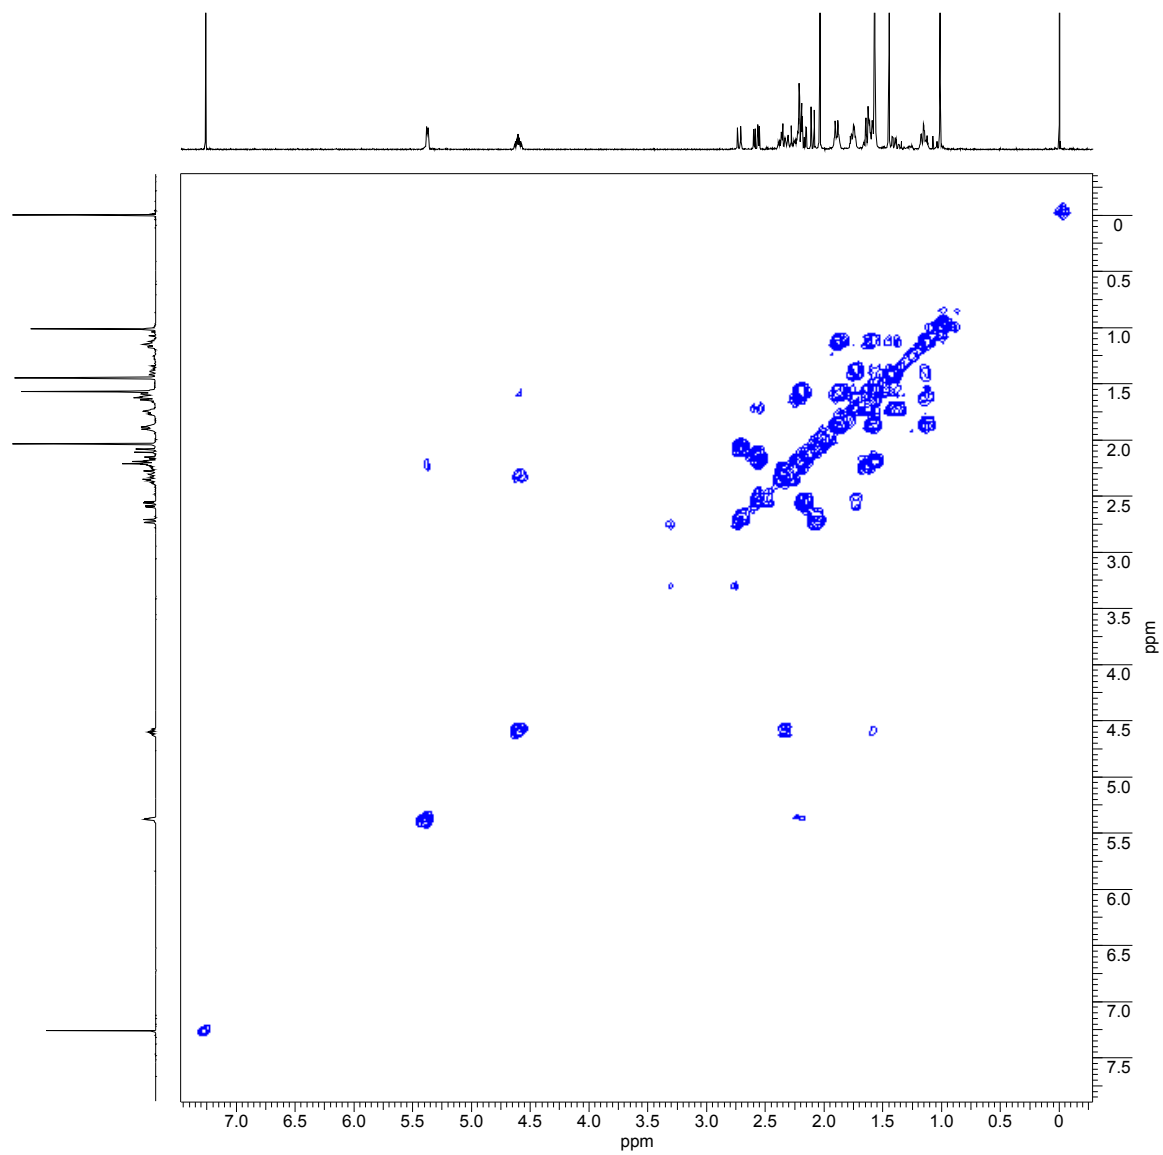

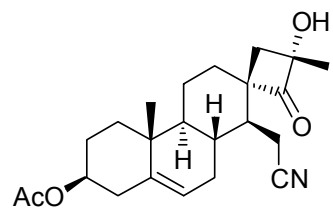

**3**

NOESY (500 MHz, CDCl<sub>3</sub>)

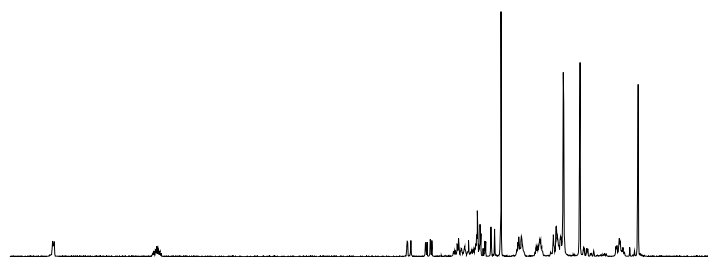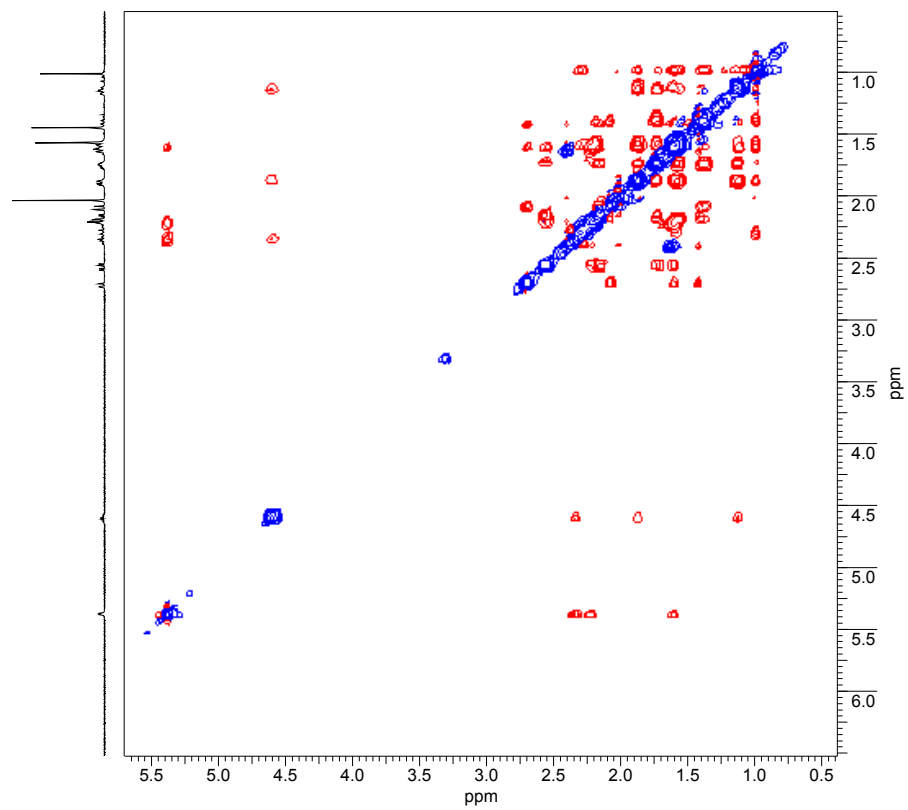

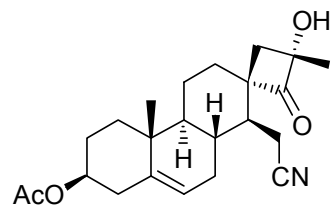

**3**

HSQC (CDCl<sub>3</sub>)

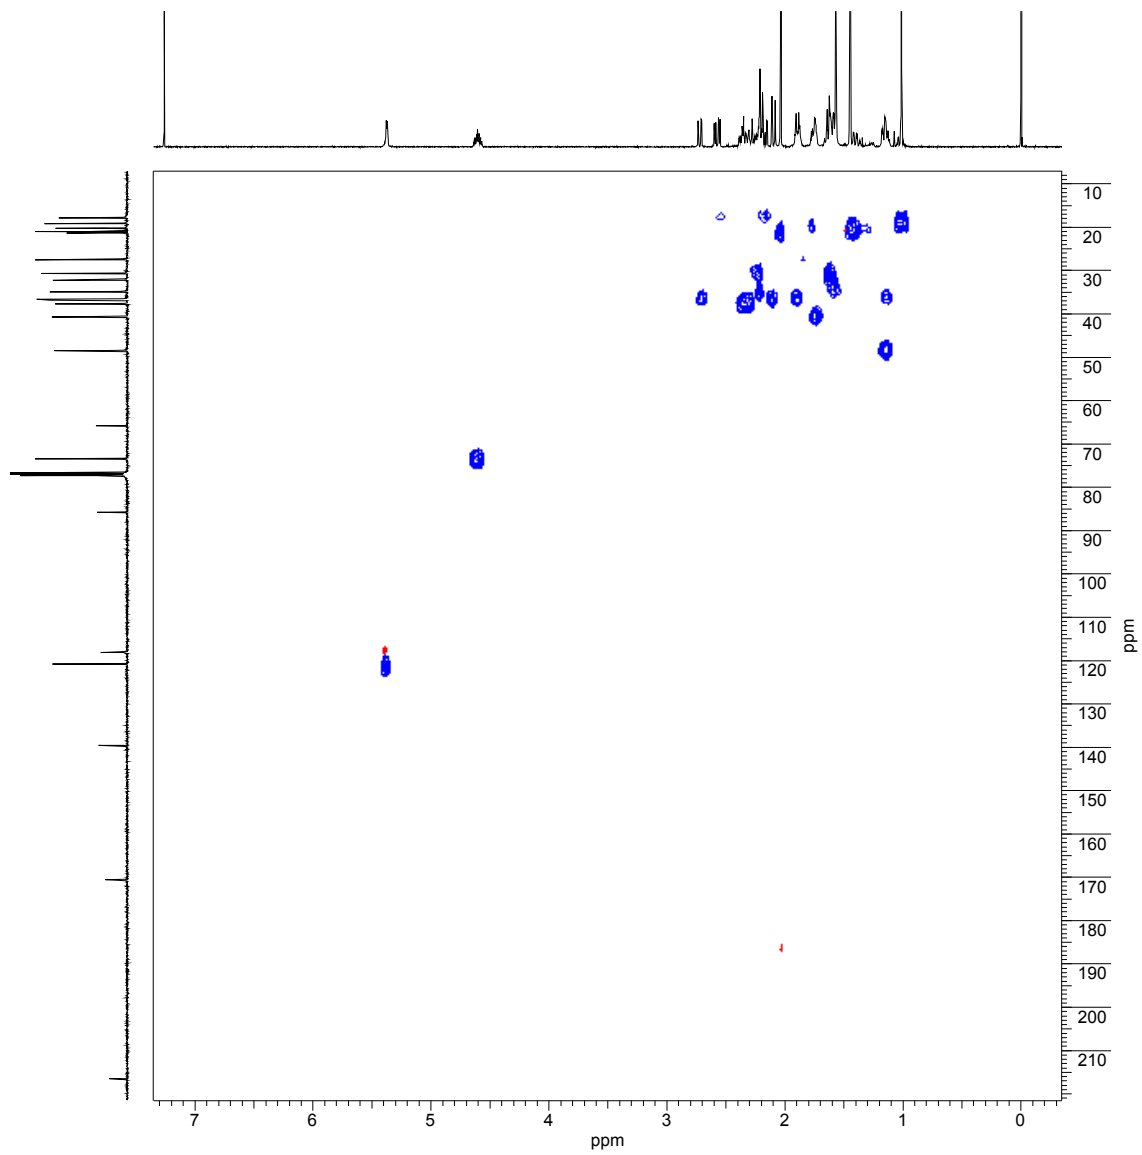

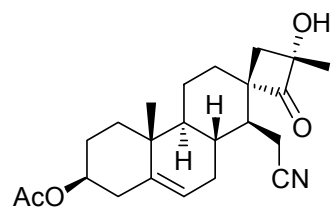

**3**

HMBC (CDCl<sub>3</sub>)

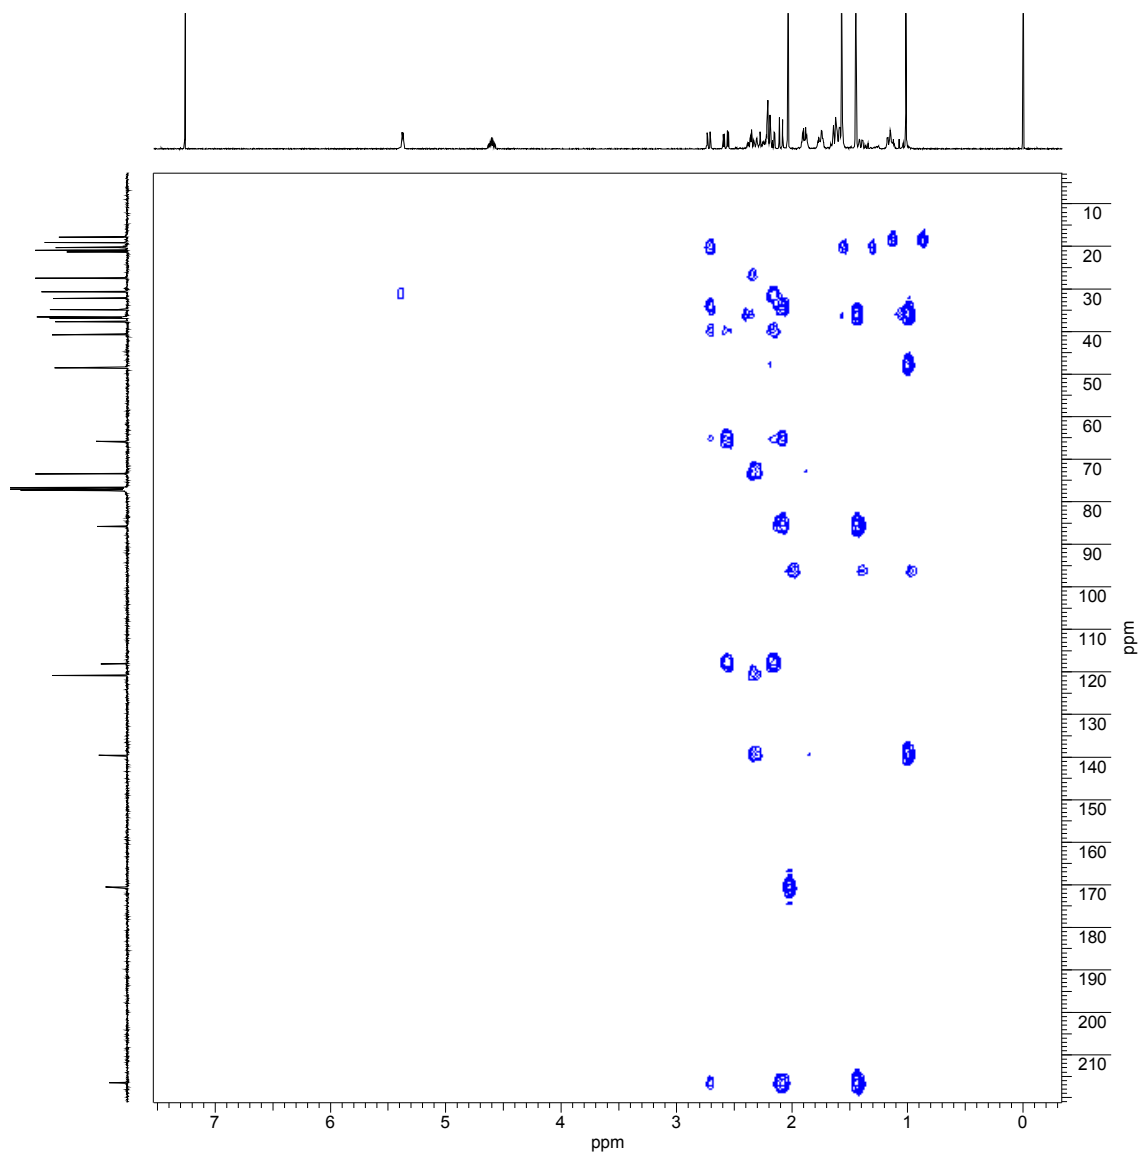



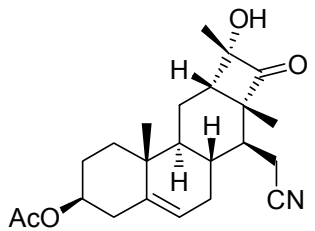

4

$^1\text{H NMR}$  (500 MHz,  $\text{CDCl}_3$ )

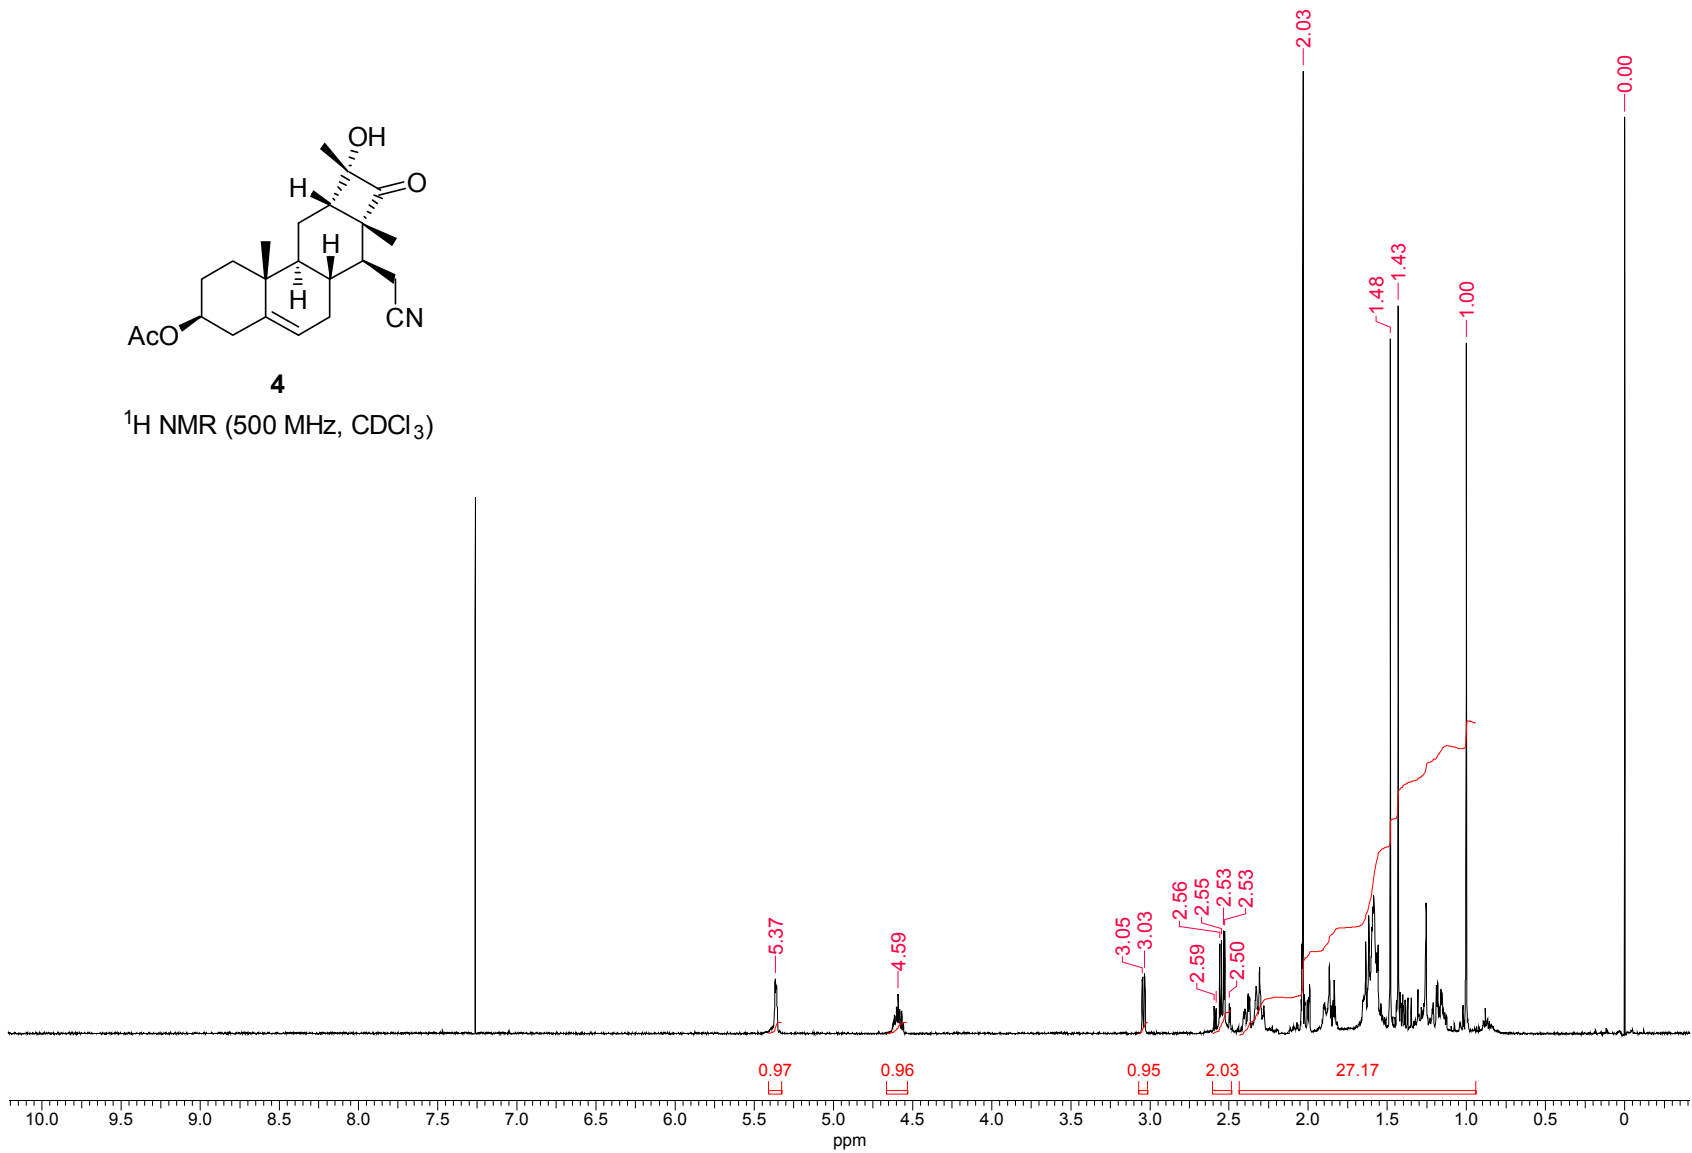

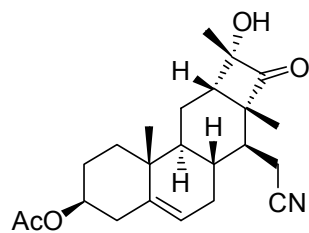

4

$^{13}\text{C}\{^1\text{H}\}$  NMR (125.7 MHz,  $\text{CDCl}_3$ )

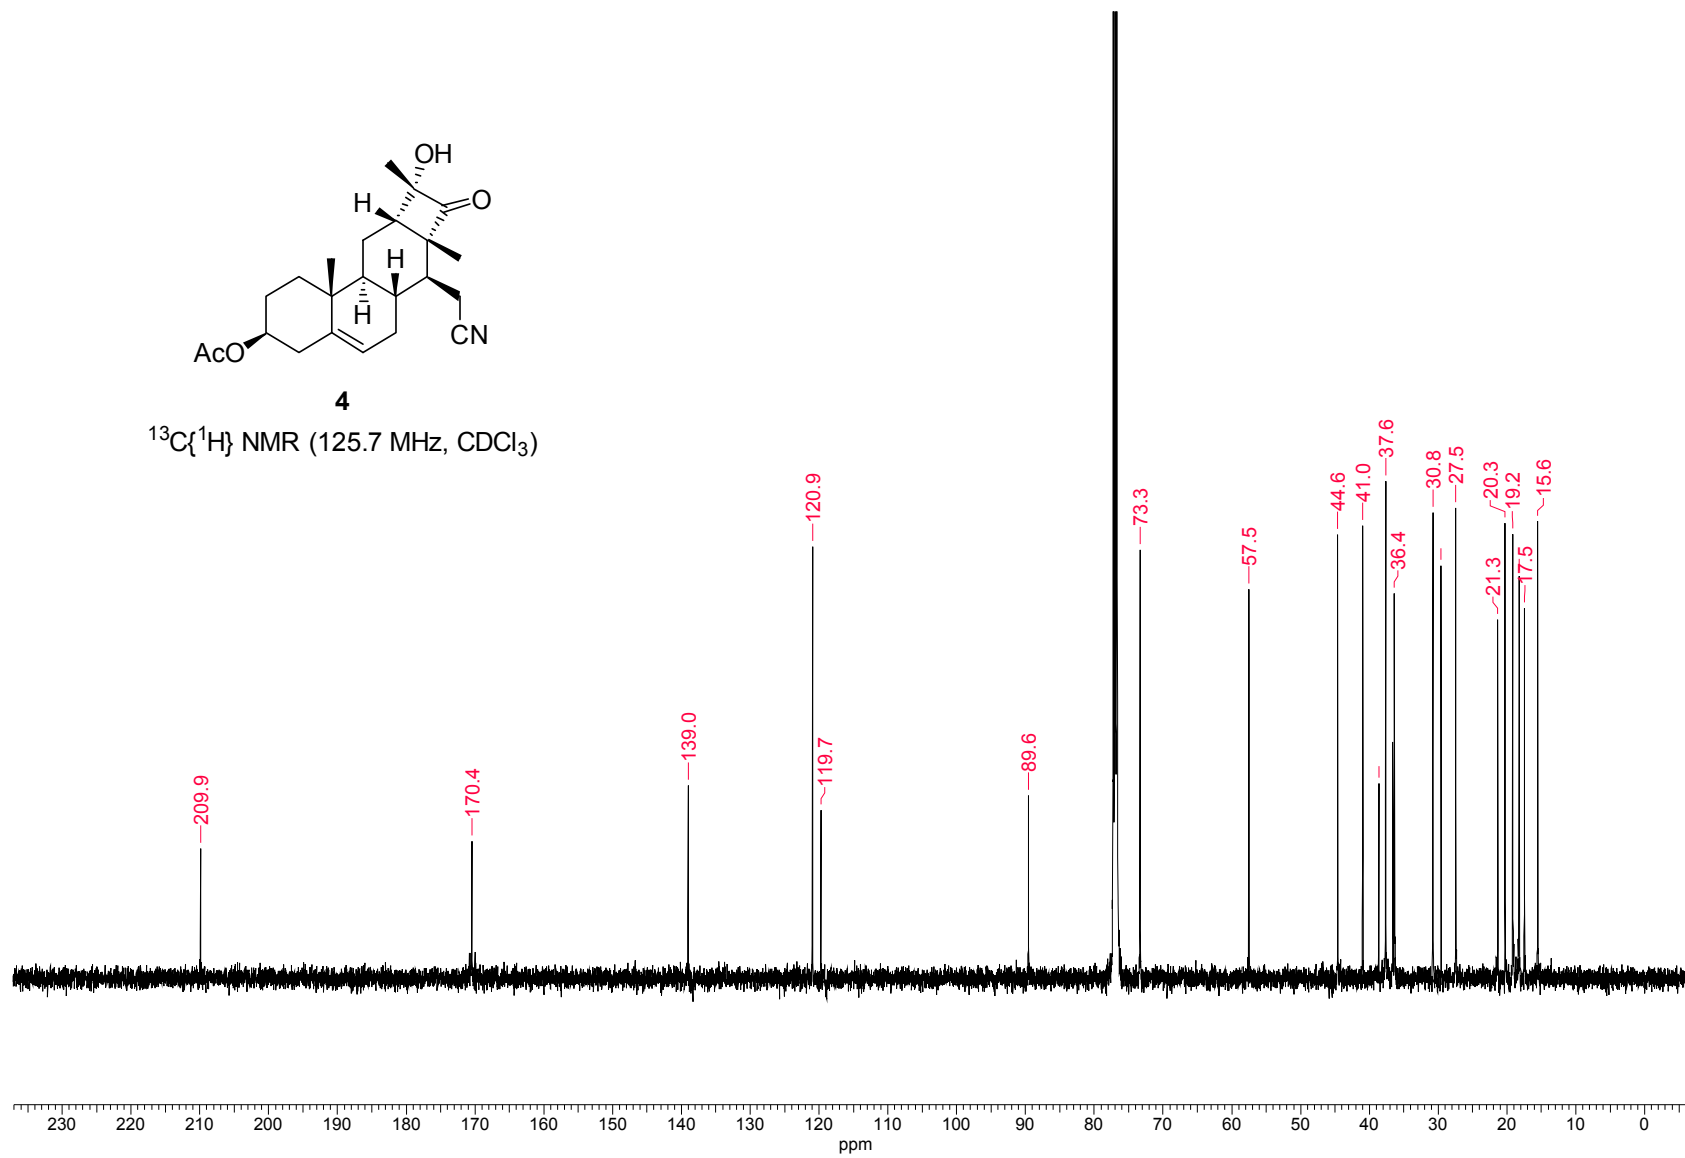

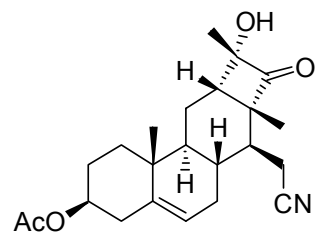

4

DEPT90 (125.7 MHz, CDCl<sub>3</sub>)

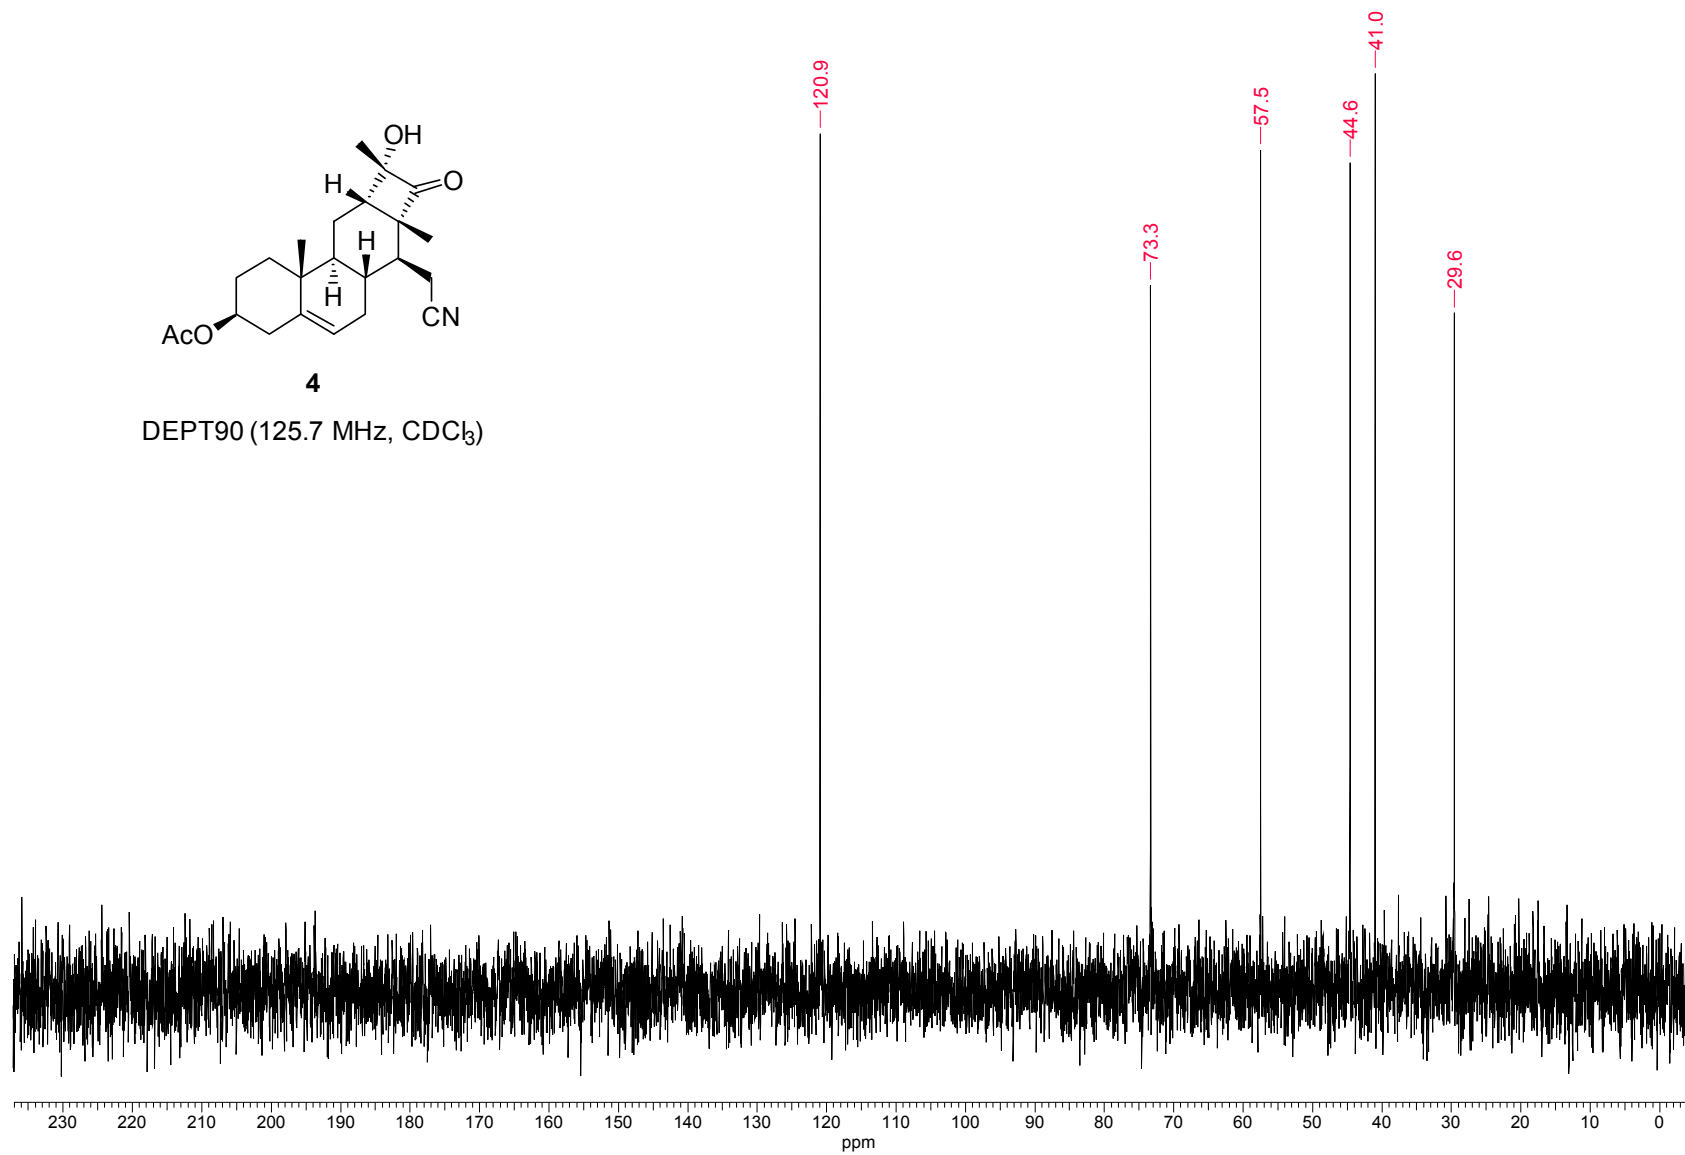

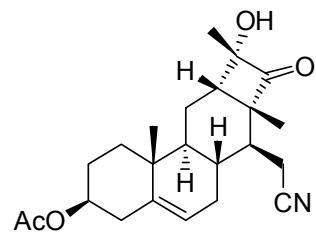

4

DEPT135 (125.7 MHz, CDCl<sub>3</sub>)

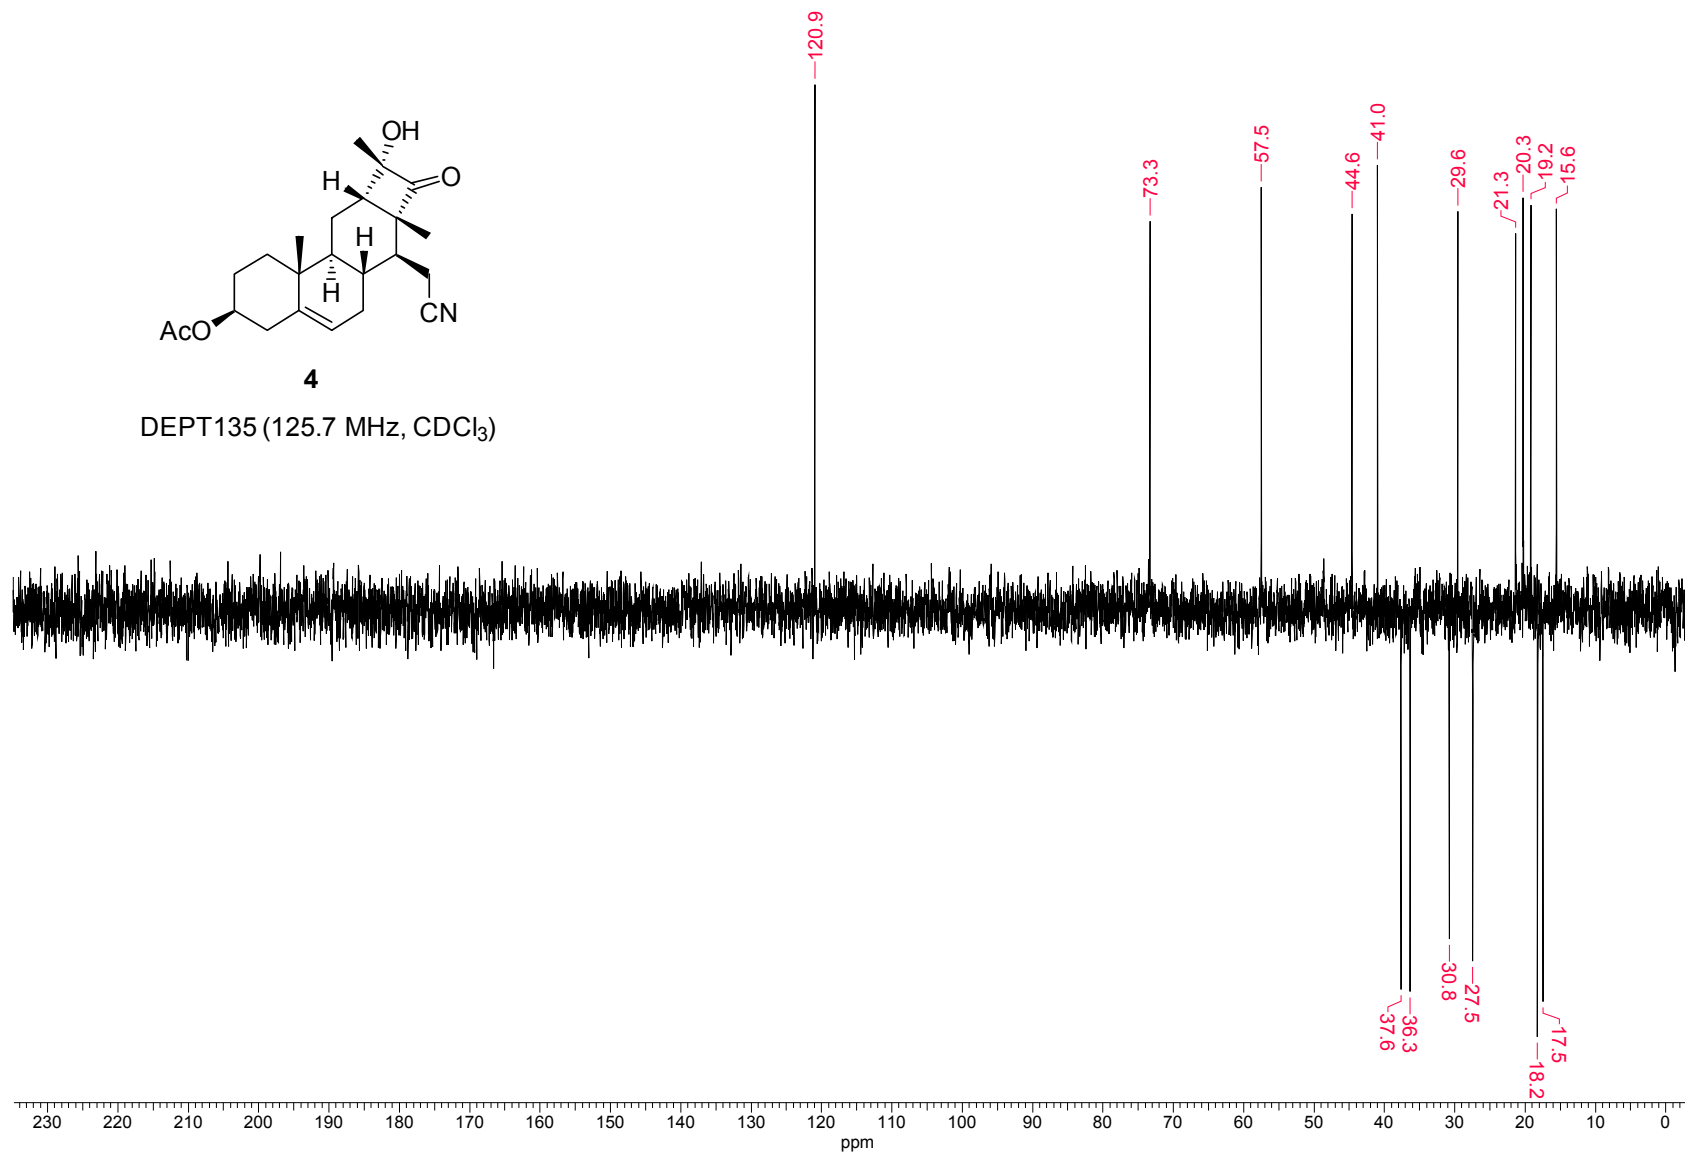

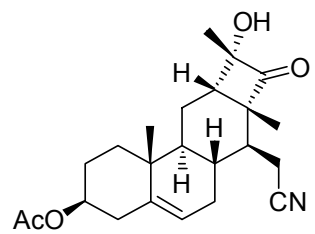

4

COSY (500 MHz, CDCl<sub>3</sub>)

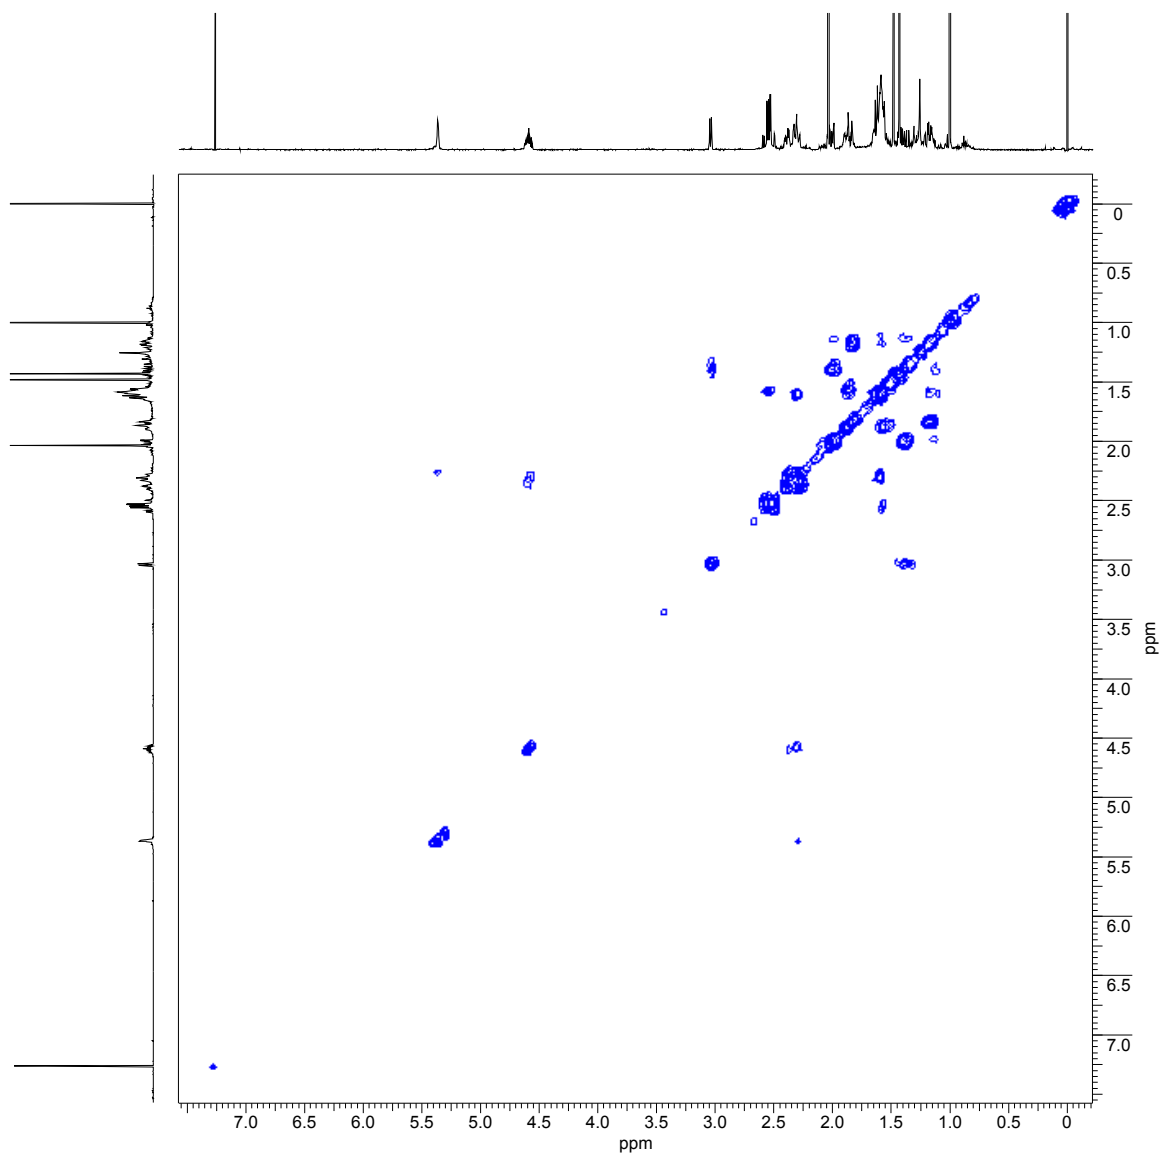

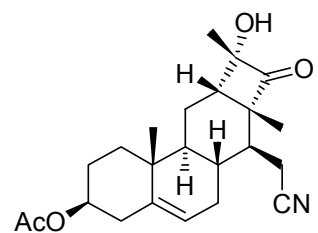

4

NOESY (500 MHz, CDCl<sub>3</sub>)

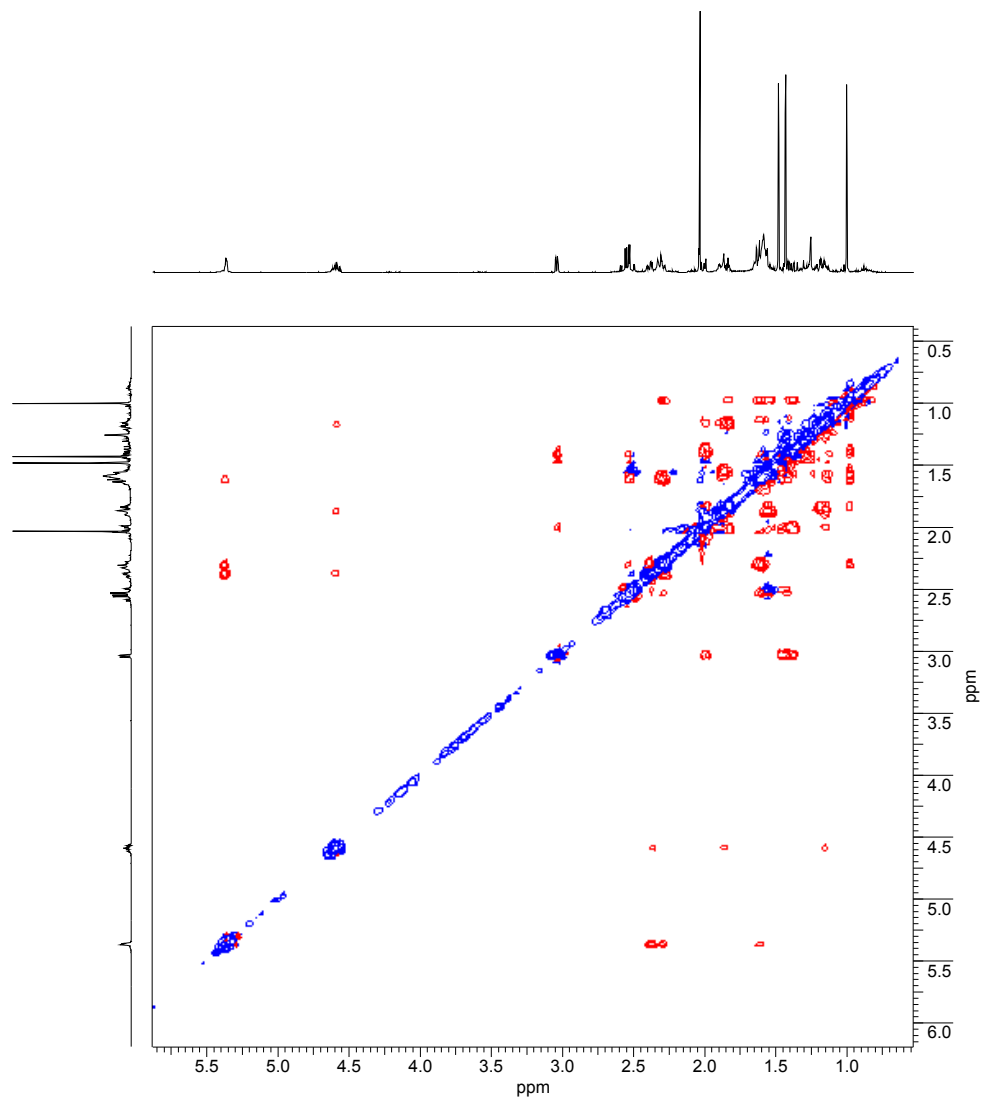

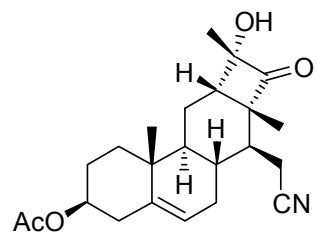

4

HSQC (CDCl<sub>3</sub>)

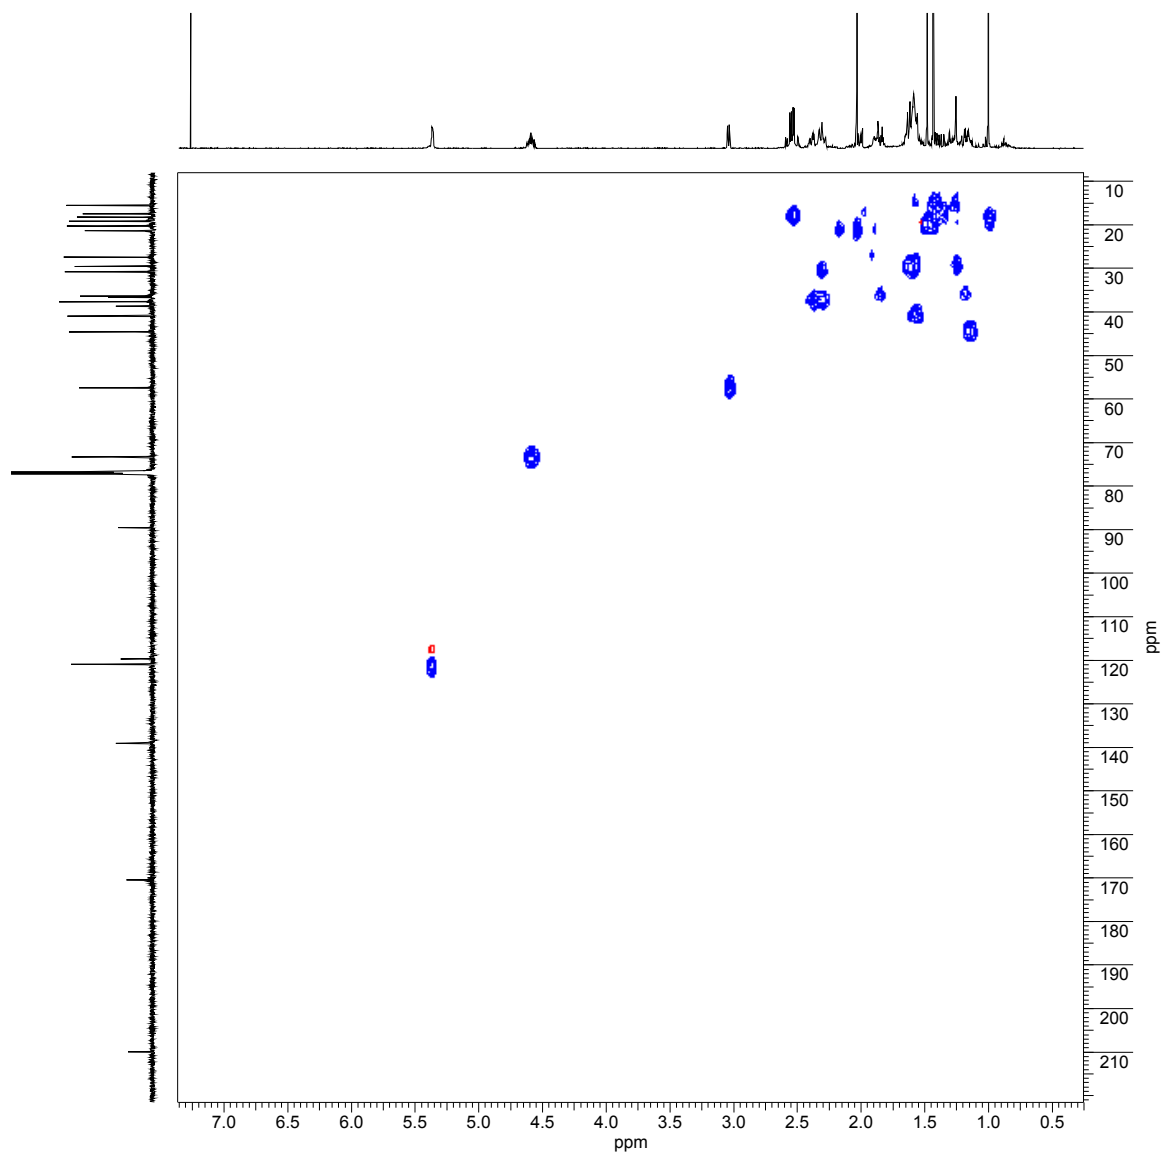

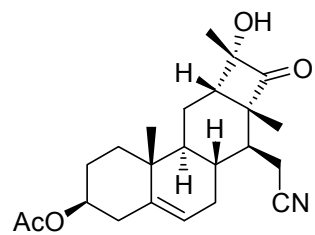

4

HMBC (CDCl<sub>3</sub>)

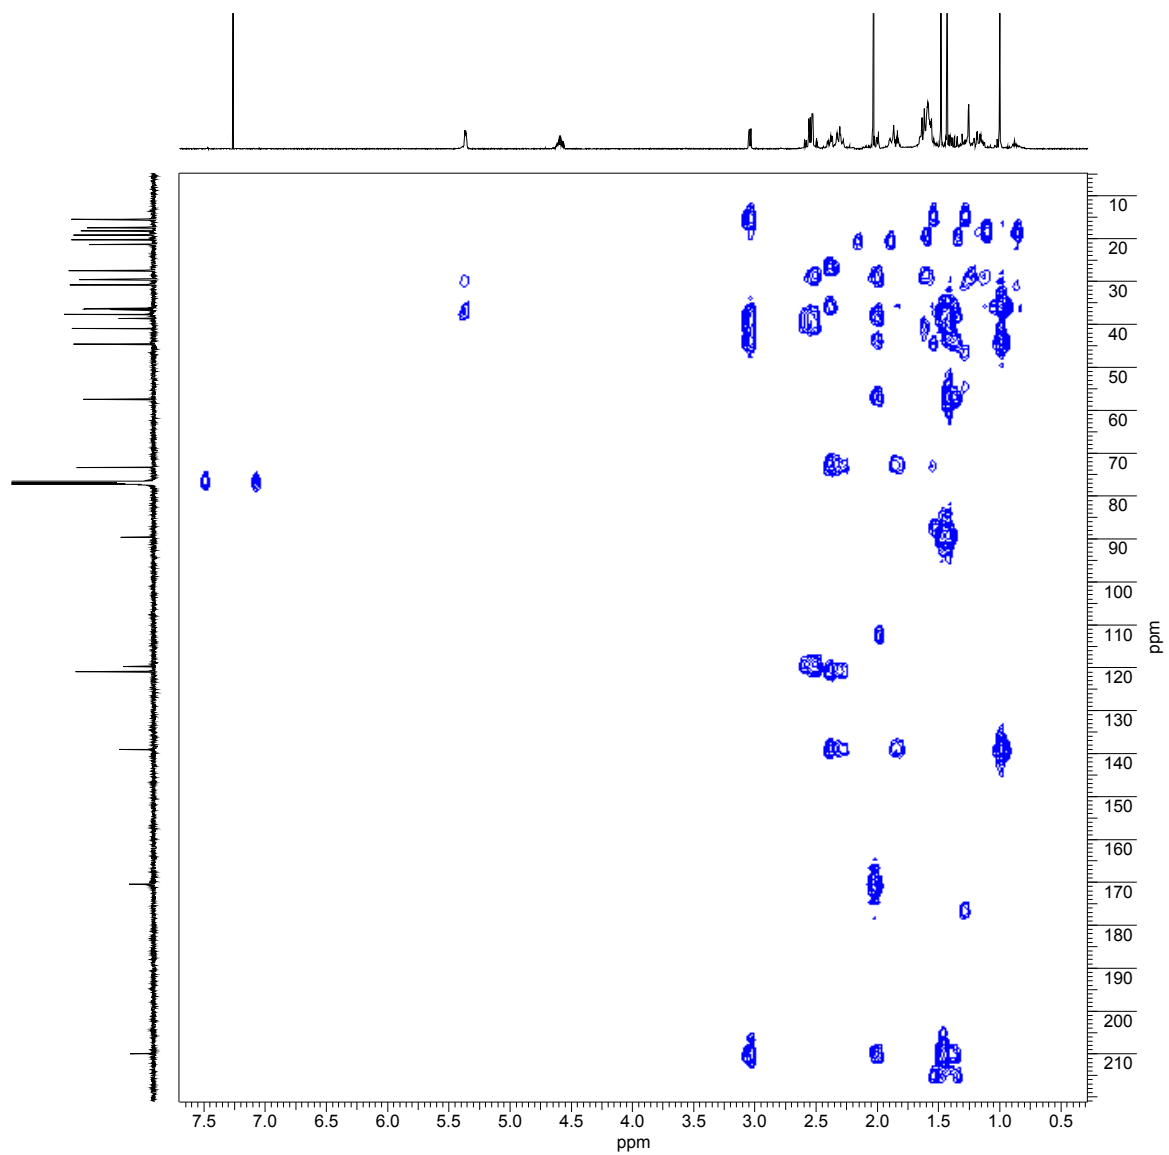

Supplement: jo2c01855_si_001.pdf [file jo2c01855_si_001.pdf]
